# Supplementary material
Source: bioRxiv or medRxiv preprint supplement (https://medrxiv.org/highwire/filestream/72404/field_highwire_adjunct_files/0/2020.02.21.20026328-1.pdf)
Supplement: Supplementary file [file 2020.02.21.20026328-1.pdf]

# Evolving epidemiology of novel coronavirus diseases 2019 and possible interruption of local transmission outside Hubei Province in China: a descriptive and modeling study

## Supplementary Appendix

Juanjuan Zhang, PhD<sup>1,#</sup>, Maria Litvinova, PhD<sup>2,#</sup>, Wei Wang, MSc<sup>1,#</sup>, Yan Wang, MSc<sup>1</sup>, Xiaowei Deng, MSc<sup>1</sup>, Xinghui Chen BSc<sup>1</sup>, Mei Li, MSc<sup>1</sup>, Wen Zheng, BSc<sup>1</sup>, Lan Yi<sup>1</sup>, Xinhua Chen, BSc<sup>1</sup>, Qianhui Wu, BSc<sup>1</sup>, Yuxia Liang, BSc<sup>1</sup>, Xiling Wang, PhD<sup>1</sup>, Juan Yang, PhD<sup>1</sup>, Kaiyuan Sun, PhD<sup>3</sup>, Prof Ira M. Longini Jr, PhD<sup>4</sup>, Prof M. Elizabeth Halloran, DSc<sup>5,6</sup>, Peng Wu, PhD<sup>7</sup>, Prof Benjamin J. Cowling, PhD<sup>7</sup>, Stefano Merler, MSc<sup>8</sup>, Cecile Viboud, PhD<sup>3</sup>, Prof Alessandro Vespignani, PhD<sup>9,2</sup>, Marco Ajelli, PhD<sup>8,†</sup>, Prof Hongjie Yu, PhD<sup>1,†</sup>

1. School of Public Health, Fudan University, Key Laboratory of Public Health Safety, Ministry of Education, Shanghai, China
2. ISI Foundation, Turin, Italy
3. Division of International Epidemiology and Population Studies, Fogarty International Center, National Institutes of Health, Bethesda, MD, USA
4. Department of Biostatistics, College of Public Health, Health Professions, and Emerging Pathogens Institute, University of Florida, Gainesville, FL, USA
5. Vaccine and Infectious Disease Division, Fred Hutchinson Cancer Research Center, Seattle, WA, USA
6. Department of Biostatistics, University of Washington, Seattle, WA, USA
7. WHO Collaborating Centre for Infectious Disease Epidemiology and Control, School of Public Health, Li Ka Shing Faculty of Medicine, University of Hong Kong, Hong Kong Special Administrative Region, China
8. Bruno Kessler Foundation, Trento, Italy
9. Laboratory for the Modeling of Biological and Socio-technical Systems, Northeastern University, Boston, MA USA

# These authors contributed equally to this work.

† These authors are joint senior authors and contributed equally to this work.

### Table of Contents

|                                                                                     |           |
|-------------------------------------------------------------------------------------|-----------|
| <b>Case definition and surveillance .....</b>                                       | <b>2</b>  |
| <b>Data source for aggregated data .....</b>                                        | <b>2</b>  |
| <b>Completeness of the individual records .....</b>                                 | <b>9</b>  |
| <b>Data consistence between our individual records and official line list .....</b> | <b>9</b>  |
| <b>Data representativeness .....</b>                                                | <b>10</b> |
| <b>Age and sex distribution of cases .....</b>                                      | <b>13</b> |
| <b>Key time to event intervals variable over time .....</b>                         | <b>13</b> |
| <b>Incubation period .....</b>                                                      | <b>15</b> |
| <b>Serial interval .....</b>                                                        | <b>16</b> |
| <b>Reproduction number .....</b>                                                    | <b>18</b> |
| <b>References .....</b>                                                             | <b>20</b> |

## Case definition and surveillance

### Case definition

In the first version of “Guideline on diagnosis and treatment of novel coronavirus infected pneumonia (NCIP)” issued by China CDC<sup>1</sup>, a suspected NCIP case was defined as pneumonia that fulfilled the clinical criteria (fever; radiographic evidence of pneumonia; low or normal white-cell count or low lymphocyte count; and no reduction in symptoms after antimicrobial treatment for 3 days following standard clinical guidelines) and had an epidemiologic link to the Huanan Seafood Wholesale Market in Wuhan or travel to Wuhan within 14 days before symptom onset. The definition of suspected case was updated in the second version issued on January 18, 2020 which deleted one of the clinical criteria (no reduction in symptoms after antimicrobial treatment for 3 days following standard clinical guidelines) to fasten the identification of cases and revised the epidemiological link as: a travel history to Wuhan or direct contact with patients from Wuhan who had fever or respiratory symptoms within 14 days of symptom onset or to be a potential case in a cluster<sup>1</sup>. The definition of suspected case was unchanged in the third version issued on January 22<sup>1</sup>. In the fourth version issued on January 27, the clinical criteria were loosened to meet any two of the three items in the previous two versions while the epidemiological link added one more link of association with laboratory confirmed case of COVID-19<sup>1</sup>. In the fifth version issued on February 4, clinically-diagnosed case defined as a suspected case with radiographic findings of pneumonia was added while only used in Hubei province<sup>2</sup>.

A laboratory confirmed case was defined as a suspected case with respiratory specimens tested positive for the severe acute respiratory syndrome coronavirus 2 (SARS-CoV-2) by a genetic sequence that matches SARS-CoV-2 in the first version and added one more method of positive results by real-time reverse-transcription-polymerase-chain-reaction (RT-PCR) assay for SARS-CoV-2 in the second and the third version<sup>1</sup>. Laboratory-confirmed case in the fourth version added another option of positive results by RT-PCR from blood sample<sup>1</sup>. Confirmed case in the fifth version for Hubei province was defined as a clinically-diagnosed case or suspected case with laboratory results in the fourth version. These two types of confirmed cases were officially announced in Hubei province since February 12, 2020.

### Surveillance for identification of cases

Details of the surveillance for identification of cases has been described by Li et al.<sup>3</sup> and we briefly summarized as follows. The earliest cases were identified by the national “pneumonia of unknown etiology” surveillance system, which was defined as an illness without causative pathogen identified that fulfilled the following criteria: fever ( $\geq 38^{\circ}\text{C}$ ), radiographic evidence of pneumonia, low or normal white-cell count or low lymphocyte count, and no symptomatic improvement after antimicrobial treatment for 3-5 days following standard clinical guideline<sup>4</sup>. In response to a cluster of viral pneumonia of unknown etiology reported in Wuhan, Hubei province, a tailed surveillance protocol to identify potential cases were developed on January 3, 2020 with the same case definition in the first version of the above case definition<sup>5</sup>. Case definition was updated when a new version of “Guideline on diagnosis and treatment of novel coronavirus infected pneumonia (NCIP)” was issued. A national, provincial and municipal joint investigation team has been assembled to conduct field investigations and implement disease control and prevention measures. Detailed field investigation was conducted to collect information on dates of illness onset, exposure history during the 2 weeks before the illness onset, visit to clinical facilities, hospitalization and clinical outcomes using standardized questionnaire. Respiratory specimens were collected for laboratory test of real-time RT-PCR or genetic sequence. All suspected cases and laboratory-confirmed cases of COVID-19 were reported to the China CDC through a national surveillance system within 2 hours since NCIP was announced to be a notifiable disease in China on January 20<sup>5</sup>.

### Data source for aggregated data

Tab. S1 lists the sources used to extract individual case and aggregated data.

**Table S1. Data sources for extracting individual cases and daily aggregated data on COVID-19.**

| Type of data sources                                                                          | Main sources for extracting daily aggregated data                                                                                                                                                                                                                                                                                                                                                                                                                                                                                                                                                                                                                                                                                                                                                                                                                                                                                                                                                                                                                                                                                                                                                                                                                                                                                                                                                                                                                                                                                                                                                                                                                                                                                                                                                                                                                                                                                                                                                                                                                                                                                                                                                                                                                                                                                                                                                                                                                                                                                                                                                                                                                                                                                                 |
|-----------------------------------------------------------------------------------------------|---------------------------------------------------------------------------------------------------------------------------------------------------------------------------------------------------------------------------------------------------------------------------------------------------------------------------------------------------------------------------------------------------------------------------------------------------------------------------------------------------------------------------------------------------------------------------------------------------------------------------------------------------------------------------------------------------------------------------------------------------------------------------------------------------------------------------------------------------------------------------------------------------------------------------------------------------------------------------------------------------------------------------------------------------------------------------------------------------------------------------------------------------------------------------------------------------------------------------------------------------------------------------------------------------------------------------------------------------------------------------------------------------------------------------------------------------------------------------------------------------------------------------------------------------------------------------------------------------------------------------------------------------------------------------------------------------------------------------------------------------------------------------------------------------------------------------------------------------------------------------------------------------------------------------------------------------------------------------------------------------------------------------------------------------------------------------------------------------------------------------------------------------------------------------------------------------------------------------------------------------------------------------------------------------------------------------------------------------------------------------------------------------------------------------------------------------------------------------------------------------------------------------------------------------------------------------------------------------------------------------------------------------------------------------------------------------------------------------------------------------|
| Type I: Websites of national, provincial, municipal and autonomous regional Health Commission | 1. National Health Commission of the People’s Republic of China ( <a href="http://www.nhc.gov.cn">http://www.nhc.gov.cn</a> )<br>2. Health Commission of Hubei Province ( <a href="http://wjw.hubei.gov.cn">http://wjw.hubei.gov.cn</a> )<br>3. Health Commission of Zhejiang Province ( <a href="http://www.zjwjw.gov.cn">http://www.zjwjw.gov.cn</a> )<br>4. Health Commission of Guangdong Province ( <a href="http://wsjkw.gd.gov.cn">http://wsjkw.gd.gov.cn</a> )<br>5. Health Commission of Henan Province ( <a href="http://www.hnwsjsw.gov.cn">http://www.hnwsjsw.gov.cn</a> )<br>6. Health Commission of Hunan Province ( <a href="http://wjw.hunan.gov.cn">http://wjw.hunan.gov.cn</a> )<br>7. Health Commission of Anhui Province ( <a href="http://wjw.ah.gov.cn">http://wjw.ah.gov.cn</a> )<br>8. Health Commission of Jiangxi Province ( <a href="http://hc.jiangxi.gov.cn">http://hc.jiangxi.gov.cn</a> )<br>9. Health Commission of Fujian Province ( <a href="http://wjw.fujian.gov.cn">http://wjw.fujian.gov.cn</a> )<br>10. Health Commission of Shandong Province ( <a href="http://wsjkw.shandong.gov.cn">http://wsjkw.shandong.gov.cn</a> )<br>11. Health Commission of Shaanxi Province ( <a href="http://sxwjw.shaanxi.gov.cn/">http://sxwjw.shaanxi.gov.cn/</a> )<br>12. Health Commission of Hebei Province ( <a href="http://www.hebwt.gov.cn">http://www.hebwt.gov.cn</a> )<br>13. Health Commission of Qinghai Province ( <a href="https://wsjkw.qinghai.gov.cn/">https://wsjkw.qinghai.gov.cn/</a> )<br>14. Health Commission of Hainan Province ( <a href="http://wst.hainan.gov.cn/swjw/index.html">http://wst.hainan.gov.cn/swjw/index.html</a> )<br>15. Health Commission of Guizhou Province ( <a href="http://www.gzhfpc.gov.cn/">http://www.gzhfpc.gov.cn/</a> )<br>16. Health Commission of Heilongjiang Province ( <a href="http://wsjkw.hlj.gov.cn/">http://wsjkw.hlj.gov.cn/</a> )<br>17. Health Commission of Jilin Province ( <a href="http://wsjkw.jl.gov.cn/">http://wsjkw.jl.gov.cn/</a> )<br>18. Health Commission of Jiangsu Province ( <a href="http://wjw.jiangsu.gov.cn/">http://wjw.jiangsu.gov.cn/</a> )<br>19. Health Commission of Gansu Province ( <a href="http://wsjk.gansu.gov.cn/">http://wsjk.gansu.gov.cn/</a> )<br>20. Health Commission of Liaoning Province ( <a href="http://wsjk.ln.gov.cn/">http://wsjk.ln.gov.cn/</a> )<br>21. Health Commission of Sichuan Province ( <a href="http://wsjkw.sc.gov.cn/">http://wsjkw.sc.gov.cn/</a> )<br>22. Health Commission of Shanxi Province ( <a href="http://wjw.shanxi.gov.cn/">http://wjw.shanxi.gov.cn/</a> )<br>23. Health Commission of Yunnan Province ( <a href="http://ynswsjkw.yn.gov.cn/">http://ynswsjkw.yn.gov.cn/</a> ) |

- 
24. Health Commission of Ningxia Hui Autonomous Region (<http://wsjkw.nx.gov.cn>)
  25. Health Commission of Inner Mongolia autonomous region (<http://wjw.nmg.gov.cn/>)
  26. Health Commission of Guangxi Zhuang Autonomous Region (<http://wsjkw.gxzf.gov.cn>)
  27. Health Commission of Xinjiang Uygur Autonomous Region (<http://www.xjhfp.gov.cn>)
  28. Health Commission of Tibet Autonomous Region(<http://wjw.xizang.gov.cn/>)
  29. Chongqing Municipal Health Commission (<http://wsjkw.cq.gov.cn>)
  30. Shanghai Municipal Health Commission (<http://wsjkw.sh.gov.cn>)
  31. Beijing Municipal Health Commission (<http://wjw.beijing.gov.cn>)
  32. Tianjin Municipal Health Commission (<http://wsjk.tj.gov.cn>)
  33. Anqing Municipal Health Commission (<http://wjw.anqing.gov.cn/>)
  34. Bengbu Municipal Health Commission (<http://wjw.bengbu.gov.cn/>)
  35. Bozhou Municipal Health Commission (<http://wjw.bozhou.gov.cn/>)
  36. Chizhou Municipal Health Commission (<http://wjw.chizhou.gov.cn/>)
  37. Chuzhou Municipal Health Commission (<http://wjw.chuzhou.gov.cn/>)
  38. Fuyang Municipal Health Commission (<http://wjw.fy.gov.cn/>)
  39. Hefei Municipal Health Commission (<http://wjw.hefei.gov.cn/>)
  40. Huaibei Municipal Health Commission (<http://wjw.huaibei.gov.cn/>)
  41. Huainan Municipal Health Commission (<http://wjw.huainan.gov.cn/>)
  42. Huangshan Municipal Health Commission (<http://wjw.huangshan.gov.cn/>)
  43. Lu'an Municipal Health Commission (<http://wjw.luan.gov.cn/>)
  44. Maanshan Municipal Health Commission (<http://wjw.mas.gov.cn/>)
  45. Tongling Municipal Health Commission (<http://wsjkw.tl.gov.cn/>)
  46. Wuhu Municipal Health Commission (<http://wsjkw.wuhu.gov.cn/>)
  47. Xuancheng Municipal Health Commission (<http://wjw.xuancheng.gov.cn/>)
  48. Longyan Municipal Health Commission (<http://wjw.longyan.gov.cn/>)
  49. Nanping Municipal Health Commission (<http://wjw.np.gov.cn/>)
  50. Ningde Municipal Health Commission (<http://wjw.ningde.gov.cn/>)
  51. Quanzhou Municipal Health Commission (<http://health.quanzhou.gov.cn/>)
  52. Sanming Municipal Health Commission (<http://wjw.sm.gov.cn/>)
  53. Xiamen Municipal Health Commission (<http://hfpc.xm.gov.cn/>)
  54. Zhangzhou Municipal Health Commission (<http://www.zhangzhou.gov.cn/cms/html/zsrmzf/swjw/index.html>)
  55. Baiyin Municipal Health Commission (<http://wjw.baiyin.gov.cn/>)
  56. Health Commission of Gannan Tibetan Autonomous Prefecture (<http://wsjk.gnzmzf.gov.cn/>)
  57. Jinchang Municipal Health Commission (<http://wjw.jcs.gov.cn/>)
  58. Jiayuguan Municipal Health Commission (<http://wjw.jyg.gov.cn/>)
  59. Jiuquan Municipal Health Commission (<http://wjw.jiuquan.gov.cn/>)
  60. Lanzhou Municipal Health Commission (<http://wjw.lanzhou.gov.cn/>)
  61. Health Commission of Linxia Hui Autonomous Prefecture (<http://www.linxia.gov.cn/Article/ArticleList?Channel=0034>)
  62. Longnan Municipal Health Commission (<http://www.longnan.gov.cn/public/column/4455597?type=4&action=list>)
  63. Dingxi Municipal Health Commission (<http://wjw.dingxi.gov.cn/>)
  64. Longxi County Health Commission (<http://www.cnlongxi.gov.cn/>)
  65. Tongwei County Health Commission (<http://www.tongwei.gov.cn/>)
  66. Pingliang Municipal Health Commission (<http://wjw.pingliang.gov.cn/>)
  67. Qingyang Municipal Health Commission (<http://wsjk.zgqingyang.gov.cn/>)
  68. Tianshui Municipal Health Commission (<http://www.tianshui.gov.cn/col/col351/index.html>)
  69. Qingshui County Health Commission (<https://www.tsqs.gov.cn/>)
  70. Wuchang Municipal Health Commission (<http://www.gswuwei.gov.cn/>)
  71. Zhangye Municipal Health Commission (<http://www.zhangye.gov.cn/wjw/>)
  72. Chaozhou Municipal Health Commission (<http://www.chaozhou.gov.cn/zwgk/szfgz/swsjhsy/index.html>)
  73. Dongguan Municipal Health Bureau (<http://dghb.dg.gov.cn/>)
  74. Foshan Municipal Health Bureau (<http://wjw.foshan.gov.cn/>)
  75. Guangzhou Municipal Health Commission (<http://wjw.gz.gov.cn/>)
  76. Huizhou Municipal Health Bureau ([http://bsdt.huizhou.gov.cn/pages/cms/hzwsj/html/deptWsbs\\_index.html](http://bsdt.huizhou.gov.cn/pages/cms/hzwsj/html/deptWsbs_index.html))
  77. Jiangmen Municipal Health Bureau (<http://www.jiangmen.gov.cn/bmpd/jmswsjkj/>)
  78. Jieyang Municipal Health Bureau (<http://www.jieyang.gov.cn/jywjj/>)
  79. Maoming Municipal Health Bureau (<http://wsjsj.maoming.gov.cn/>)
  80. Meizhou Municipal Health Bureau (<http://www.gdmx.gov.cn/mzmxwsj/gkmlpt/index>)
  81. Qingyuan Municipal Health Bureau (<http://www.gdqy.gov.cn/channel/qyswsjkj/>)
  82. Shantou Municipal Health Bureau (<https://www.shantou.gov.cn/wjj/>)
  83. Shanwei Municipal Health Bureau (<http://www.shanwei.gov.cn/swwj/>)
  84. Shaoguan Municipal Health Bureau (<http://wsjk.sg.gov.cn/>)
  85. Shenzhen Municipal Health Commission (<http://wjw.sz.gov.cn/>)
  86. Yangjiang Municipal Health Bureau (<http://www.yangjiang.gov.cn/yjwsj/gkmlpt/mindex>)
  87. Zhanjiang Municipal Health Bureau (<https://www.zhanjiang.gov.cn/bmzz/zjswsjkj/index.html>)
  88. Zhaoqing Municipal Health Bureau (<http://wjw.zhaoqing.gov.cn/>)
  89. Zhongshan Municipal Health Bureau (<http://wjw.zs.gov.cn/index.html>)
  90. Zhuhai Municipal Health Bureau (<http://wsjkj.zhuhai.gov.cn/>)
  91. Baise Municipal Health Commission (<http://www.baise.gov.cn/>)
  92. Beihai Municipal Health Commission (<http://xxgk.beihai.gov.cn/bhswshjhsywyh/#.airline>)
  93. Fangchenggang Municipal Health Commission (<http://www.fcgs.gov.cn/wjw/>)
  94. Guilin Municipal Health Commission (<http://wjw.guilin.gov.cn/>)
  95. Hechi Municipal Health Commission (<http://wjw.hechi.gov.cn/>)
  96. Hezhou Municipal Health Commission (<http://www.gxhz.gov.cn/>)
  97. Liuzhou Municipal Health Commission (<http://wjw.liuzhou.gov.cn/>)
  98. Nanning Municipal Health Commission (<http://wjw.nanning.gov.cn/>)
  99. Qinzhou Municipal Health Commission (<http://zwgk.qinzhou.gov.cn/auto2540/>)
  100. Wuzhou Municipal Health Commission (<http://wjw.wuzhou.gov.cn/>)
  101. Anshun Municipal Health Bureau (<http://wjw.anshun.gov.cn/>)
-

- 
102. Bijie Municipal Health Bureau (<http://www.bijie.gov.cn/bm/bjswsjk/index.shtml>)
  103. Guiyang Municipal Health Bureau (<http://wsjkj.guiyang.gov.cn/>)
  104. Liupanshui Municipal Health Bureau (<http://swjj.gzlps.gov.cn/>)
  105. Health Bureau of Qiandongnan Miao and Dong Autonomous Prefecture (<http://wsjsw.qdn.gov.cn/>)
  106. Health Bureau of Qiannan Buyi and Miao Autonomous Prefecture (<http://wsjkj.qiannan.gov.cn/>)
  107. Health Bureau of Southwest Guizhou Autonomous Prefecture ([http://www.qxn.gov.cn/zwgk/zfjg/zwsjkj\\_5135241/bmxxgkml\\_5135244/](http://www.qxn.gov.cn/zwgk/zfjg/zwsjkj_5135241/bmxxgkml_5135244/))
  108. Tongren Municipal Health Bureau (<http://wjwt.rsgov.cn/>)
  109. Zunyi Municipal Health Bureau (<http://wsjkj.zunyi.gov.cn/>)
  110. Baoting County Health Commission (<http://baoting.hainan.gov.cn/baoting/zt/yqfk/index.html>)
  111. Health Commission of Changjiang Li Autonomous County (<http://changjiang.hainan.gov.cn/>)
  112. Chengmai County Health Commission (<http://chengmai.hainan.gov.cn/>)
  113. Danzhou Municipal Health Commission (<http://www.danzhou.gov.cn/danzhou/index.html>)
  114. Dingan County Health Commission (<http://dingan.hainan.gov.cn/dingan/>)
  115. Dongfang County Health Commission (<http://dongfang.hainan.gov.cn/index.html>)
  116. Haikou Municipal Health Commission (<http://wjwt.haikou.gov.cn/>)
  117. Health Commission of Ledong li autonomous County(<http://ledong.hainan.gov.cn/>)
  118. Lingao County Health Commission (<http://lingao.hainan.gov.cn/>)
  119. Lingshui County Health Commission (<http://lingshui.hainan.gov.cn/>)
  120. Qionghai County Health Commission (<http://qionghai.hainan.gov.cn/>)
  121. Qiongzong County Health Commission (<http://qiongzong.hainan.gov.cn/>)
  122. Sanya Municipal Health Commission (<http://ws.sanya.gov.cn/>)
  123. Wanning Municipal Health Commission (<http://wanning.hainan.gov.cn/wanning/index.html>)
  124. Wenchang Municipal Health Commission (<http://wenchang.hainan.gov.cn/wcswwshjshywyh/wcbindex.shtml>)
  125. Baoding Municipal Health Commission (<http://www.bdsww.gov.cn/>)
  126. Cangzhou Municipal Health Commission (<http://www.cangzhou.gov.cn/>)
  127. Chengde Municipal Health Commission (<http://wjwt.chengde.gov.cn/>)
  128. Handan Municipal Health Commission (<http://wjwt.hd.gov.cn/>)
  129. Hengshui Municipal Health Commission (<http://wjwt.hengshui.gov.cn/>)
  130. Langfang Municipal Health Commission (<http://wjwt.lf.gov.cn/html/index.html>)
  131. Qinhuangdao Municipal Health Commission (<http://wjwt.qhd.gov.cn/>)
  132. Shijiazhuang Municipal Health Commission (<http://wsjk.sjz.gov.cn/>)
  133. Tangshan Municipal Health Commission (<http://wsjkwyh.tangshan.gov.cn/>)
  134. Xingtai Municipal Health Commission (<http://wsjkw.xingtai.gov.cn/>)
  135. Zhangjiakou Municipal Health Commission (<http://wjwt.zjk.gov.cn/index.do?templet=index>)
  136. Daqing Municipal Health Commission (<http://www.daqing.gov.cn/>)
  137. Harbin Municipal Health Commission (<http://www.harbin.gov.cn/>)
  138. Hegang Municipal Health Commission (<http://www.hegang.gov.cn/>)
  139. Jixi Municipal Health Commission (<http://www.jixi.gov.cn/>)
  140. Mudanjiang Municipal Health Commission ([http://www.mdj.gov.cn/index\\_53.html](http://www.mdj.gov.cn/index_53.html))
  141. Qitaihe Municipal Health Commission (<http://www.qth.gov.cn/xsboxt/sxdw/wsjsx/>)
  142. Shuangyashan Municipal Health Commission (<http://www.shuangyashan.gov.cn/index/html/bm/wsj/indexwjwt.jsp>)
  143. Suihua Municipal Health Commission (<http://www.suihua.gov.cn/pages/website/index.html>)
  144. Anyang Municipal Health Commission (<http://aywjwt.anyang.gov.cn/>)
  145. Health and Family Planning Commission of Dengzhou (<http://dengzhou.gov.cn/wjwt/index.htm>)
  146. Gongyi Municipal Health Commission ([http://www.gongyishi.gov.cn/portal/gyzx/ztzl/xgfyfk/A01021745index\\_1.htm](http://www.gongyishi.gov.cn/portal/gyzx/ztzl/xgfyfk/A01021745index_1.htm))
  147. Hebi Municipal Health Commission (<https://wsjkw.hebi.gov.cn/>)
  148. Jiyuan Municipal Health Commission (<http://wjwt.jiyuan.gov.cn/>)
  149. Jiaozuo Municipal Health Commission (<http://www.jzswjwt.gov.cn/>)
  150. Kaifeng Municipal Health Commission (<http://www.kfwsjsw.gov.cn/>)
  151. Luohe Municipal Health Commission (<http://www.lhswjwt.gov.cn/>)
  152. Luoyang Municipal Health Commission (<http://www.lyws.gov.cn/>)
  153. Nanyang Municipal Health Commission (<http://nyws.nanyang.gov.cn/>)
  154. Pingdingshan Municipal Health Commission (<http://www.pdswwsjsw.gov.cn/>)
  155. Sanmenxia Municipal Health Commission (<http://wjwt.smx.gov.cn/>)
  156. Shangqiu Municipal Health Commission (<http://www.shangqiu.gov.cn/>)
  157. Xinxiang Municipal Health Commission (<http://www.xxswjwt.gov.cn/>)
  158. Xinyang Municipal Health Commission (<http://www.hnxywjwt.gov.cn/>)
  159. Xuchang Municipal Health Commission (<http://xcswjwt.xuchang.gov.cn/ztzl/secondpage.html>)
  160. Zhengzhou Municipal Health Commission (<http://wjwt.zhengzhou.gov.cn/>)
  161. Zhoukou Municipal Health Commission (<http://www.zkwjwt.gov.cn/>)
  162. Zhumadian Municipal Health Sports Commission (<http://www.zmdwsj.gov.cn/>)
  163. Anlu Municipal Health Commission (<http://www.anlu.gov.cn/>)
  164. Hanchuan Municipal Health Commission (<http://www.hanchuan.gov.cn/>)
  165. Huanggang Municipal Health Commission (<http://wjwt.hg.gov.cn/>)
  166. Huangshi Municipal Health Commission (<http://wjwt.huangshi.gov.cn/>)
  167. Jingzhou Municipal Health Commission (<http://wjwt.jingzhou.gov.cn/>)
  168. Shiyan Municipal Health Commission (<http://wjwt.shiyan.gov.cn/>)
  169. Tianmen Municipal Health Commission (<http://www.tianmen.gov.cn/>)
  170. Wuhan Municipal Health Commission (<http://wjwt.wuhan.gov.cn/>)
  171. Xiangyang Municipal Health Commission (<http://wjwt.xiangyang.gov.cn/>)
  172. Xianning Municipal Health Commission (<http://wjwt.xianning.gov.cn/>)
  173. Xiaogan Municipal Health Commission (<http://wjwt.xiaogan.gov.cn/>)
  174. Yichang Municipal Health Commission (<http://wjwt.yichang.gov.cn/>)
  175. Changsha Municipal Health Commission (<http://wsjkw.changsha.gov.cn/>)
  176. Chenzhou Municipal Health Commission (<http://wsjsw.czs.gov.cn/>)
  177. Hengyang Municipal Health Commission (<http://wjwt.hengyang.gov.cn/>)
  178. Huaihua Municipal Health Commission (<http://letter.huaihua.gov.cn/wsjkw/>)
-

---

179. Loudi Municipal Health Commission (<http://wjw.hnloudi.gov.cn/>)  
180. Shaoyang Municipal Health Commission (<https://wjw.shaoyang.gov.cn/>)  
181. Xiangtan Municipal Health Commission (<http://wsjkw.xiangtan.gov.cn/>)  
182. Municipal Health Commission of Xiangxi Tujia and Miao Autonomous Prefecture (<http://wsjkwyyh.xx.gov.cn/>)  
183. Yiyang Municipal Health Commission (<http://www.yiyang.gov.cn/yyswsjkwyyh/>)  
184. Yongzhou Municipal Health Commission (<http://wjw.yzcity.gov.cn/>)  
185. Yueyang Municipal Health Commission (<http://wsj.yueyang.gov.cn/>)  
186. Zhuzhou Municipal Health Commission (<http://wjw.zhuzhou.gov.cn/>)  
187. Baotou Municipal Health Commission (<http://wjw.baotou.gov.cn/>)  
188. Bayannur Municipal Health Commission (<http://www.bynrws.gov.cn/>)  
189. Health Commission of Hinggan League (<http://wjw.xam.gov.cn/>)  
190. Hohhot Municipal Health Commission (<http://wjw.huhhot.gov.cn/>)  
191. Hulun Buir Municipal Health Commission (<http://wjw.hlbe.gov.cn/>)  
192. Manzhouli Municipal Health Commission (<http://www.manzhouli.gov.cn/>)  
193. Ordos Municipal Health Commission (<http://wjw.ordos.gov.cn/www/tzggw/>)  
194. Ulanqab Municipal Health Commission (<http://wjw.wulanchabu.gov.cn/>)  
195. Health Commission of Huade County (<http://www.huade.gov.cn/>)  
196. Health Commission of Siziwang County (<http://www.szwq.gov.cn/>)  
197. Tongliao Municipal Health Commission (<http://wjw.tongliao.gov.cn/>)  
198. Xilinhot Municipal Health Commission (<http://www.xilinhaote.gov.cn/>)  
199. Changzhou Municipal Health Commission (<http://wjw.changzhou.gov.cn/>)  
200. Huai'an Municipal Health Commission (<http://wjw.huaian.gov.cn/>)  
201. Lianyungang Municipal Health Commission (<http://wjw.lyg.gov.cn/>)  
202. Nanjing Municipal Health Commission (<http://wjw.nanjing.gov.cn/>)  
203. Nantong Municipal Health Commission (<http://wjw.nantong.gov.cn/>)  
204. Suqian Municipal Health Commission (<http://wsj.suqian.gov.cn/>)  
205. Suzhou Municipal Health Commission (<http://wsjkw.suzhou.gov.cn/>)  
206. Wuxi Municipal Health Commission (<http://wjw.wuxi.gov.cn/>)  
207. Xuzhou Municipal Health Commission (<http://ws.xz.gov.cn/>)  
208. Yancheng Municipal Health Commission (<http://wsj.yancheng.gov.cn/>)  
209. Yangzhou Municipal Health Commission (<http://wjw.yangzhou.gov.cn/>)  
210. Zhenjiang Municipal Health Commission (<http://wjw.zhenjiang.gov.cn/>)  
211. Changde Municipal Health Commission (<http://wjw.changde.gov.cn/>)  
212. Fuzhou Municipal Health Commission (<http://wjw.jxfz.gov.cn/>)  
213. Ganzhou Municipal Health Commission (<http://wjw.ganzhou.gov.cn/>)  
214. Ji'an Municipal Health Commission (<http://wsjk.jian.gov.cn/>)  
215. Jingdezhen Municipal Health Commission (<http://wsjs.jdz.gov.cn/>)  
216. Jiujiang Municipal Health Commission (<http://wjw.jiujiang.gov.cn/>)  
217. Nanchang Municipal Health Commission (<http://hc.nc.gov.cn/>)  
218. Pingxiang Municipal Health Commission (<http://wjw.pingxiang.gov.cn/>)  
219. Shangrao Municipal Health Commission (<http://www.srswjw.gov.cn/>)  
220. Xinyu Municipal Health Commission (<http://wjw.xinyu.gov.cn/>)  
221. Yichun Municipal Health Commission (<http://wjw.yichun.gov.cn/>)  
222. Yingtan Municipal Health Commission (<http://wjw.yingtang.gov.cn/>)  
223. Baicheng Municipal Health Commission (<http://wjw.jlbc.gov.cn/>)  
224. Baishan Municipal Health Commission (<http://wsjkw.cbs.gov.cn/>)  
225. Changchun Municipal Health Commission (<http://wjw.changchun.gov.cn/>)  
226. Gongzhuling Municipal Health Commission (<http://www.gongzhuling.gov.cn/>)  
227. Jilin Municipal Health Commission (<http://wjw.jlcity.gov.cn/>)  
228. Liaoyuan Municipal Health Commission (<http://wjw.liaoyuan.gov.cn/>)  
229. Siping Municipal Health Commission (<http://wjw.siping.gov.cn/>)  
230. Songyuan Municipal Health Commission (<http://wsjkw.jlsy.gov.cn/>)  
231. Tonghua Municipal Health Commission (<http://www.tonghua.gov.cn/wjw/>)  
232. Health Commission of Yanbian Korean Autonomous Prefecture (<http://www.yanbian.gov.cn/>)  
233. Anshan Municipal Health Commission (<http://wjw.anshan.gov.cn/>)  
234. Benxi Municipal Health Commission (<http://wjw.benxi.gov.cn/>)  
235. Chaoyang Municipal Health Commission (<http://wjw.zgcy.gov.cn/>)  
236. Dalian Municipal Health Commission (<http://hcod.dl.gov.cn/web/guest>)  
237. Dandong Municipal Health Commission (<http://wsjsw.dandong.gov.cn/>)  
238. Fushun Municipal Health Commission (<http://fswjw.fushun.gov.cn/>)  
239. Fuxin Municipal Health Commission (<http://www.fuxin.gov.cn/fxswsj/index.html>)  
240. Huludao Municipal Health Commission (<http://wsjkw.hld.gov.cn/>)  
241. Jinzhou Municipal Health Commission (<http://wjw.jz.gov.cn/jzswsindex/jzswsindex;JSESSIONID=04402120-355a-429a-b5af-74bf959a6d0a>)  
242. Liaoyang Municipal Health Commission (<http://wjw.liaoyang.gov.cn/>)  
243. Panjin Municipal Health Commission (<http://wjw.panjin.gov.cn/>)  
244. Shenyang Municipal Health Commission (<http://wjw.shenyang.gov.cn/>)  
245. Tieling Municipal Health Commission (<http://wjw.tieling.gov.cn/>)  
246. Yingkou Municipal Health Commission (<http://wjw.yingkou.gov.cn/>)  
247. Guyuan Municipal Health Commission (<http://www.nxgy.gov.cn/>)  
248. Wuzhong Municipal Health Commission (<http://www.wuzhong.gov.cn/ztl/ztlb/jtjgczl/wsjhj/>)  
249. Yinchuan Municipal Health Commission (<http://wjw.yinchuan.gov.cn/>)  
250. Zhongwei Municipal Health Commission (<http://www.znwf.gov.cn/>)  
251. Health Commission of Tibetan Autonomous Prefecture of Haibei (<http://www.haibei.gov.cn/>)  
252. Xining Municipal Health Commission (<http://wjw.xining.gov.cn/>)  
253. Ankang Municipal Health Commission (<http://wjj.ankang.gov.cn/>)  
254. Baoji Municipal Health Commission (<http://wjw.baoji.gov.cn/>)  
255. Hancheng Municipal Health Commission (<http://www.hancheng.gov.cn/gk/>)  
256. Hanzhong Municipal Health Commission (<http://www.hanzhong.gov.cn/xxgk/>)

---

---

257. Health Commission of Xixiang county (<http://www.snxx.gov.cn/>)  
258. Shangluo Municipal Health Commission (<http://wjw.shangluo.gov.cn/>)  
259. Health Commission of Luonan County (<http://www.luonan.gov.cn/>)  
260. Tongchuan Municipal Health Commission (<http://wsjkw.tongchuan.gov.cn/>)  
261. Weinan Municipal Health Commission (<http://wsjsj.weinan.gov.cn/>)  
262. Xi'an Municipal Health Commission (<http://xawjw.xa.gov.cn/>)  
263. Xianyang Municipal Health Commission (<http://wjw.xys.gov.cn/>)  
264. Yan'an Municipal Health Commission (<http://wjw.yanan.gov.cn/>)  
265. Health Bureau of Yangling (<http://wsjkj.yangling.gov.cn/>)  
266. Yulin Municipal Health Commission (<http://wjw.yl.gov.cn/>)  
267. Binzhou Municipal Health Commission (<http://wjw.binzhou.gov.cn/index.php>)  
268. Dezhou Municipal Health Commission (<http://dzwjw.dezhou.gov.cn/>)  
269. Dongying Municipal Health Commission (<http://dywsjk.dongying.gov.cn/>)  
270. Heze Municipal Health Commission (<http://hzswwsjk.heze.gov.cn/>)  
271. Jinan Municipal Health Commission (<http://jnmhc.jinan.gov.cn/>)  
272. Jining Municipal Health Commission (<http://wjw.jining.gov.cn/>)  
273. Liaocheng Municipal Health Commission (<http://wjw.liaocheng.gov.cn/>)  
274. Linyi Municipal Health Commission (<http://wsjsw.linyi.gov.cn/>)  
275. Qingdao Municipal Health Commission (<http://wsjsw.qingdao.gov.cn/n28356065/index.html>)  
276. Rizhao Municipal Health Commission (<http://wsjkw.rizhao.gov.cn/>)  
277. Taian Municipal Health Commission (<http://wjw.taian.gov.cn/>)  
278. Weifang Municipal Health Commission (<http://wsjkw.weifang.gov.cn/>)  
279. Weihai Municipal Health Commission (<http://wsjkw.weihai.gov.cn/>)  
280. Yantai Municipal Health Commission (<http://wjw.yantai.gov.cn/>)  
281. Zaozhuang Municipal Health Commission (<http://wsjkw.zaozhuang.gov.cn/>)  
282. Zibo Municipal Health Commission (<http://ws.zibo.gov.cn/>)  
283. Changzhi Municipal Health Commission (<http://www.wjw.changzhi.gov.cn/>)  
284. Datong Municipal Health Commission  
(<http://www.dt.gov.cn/dtxxgk/xxgktree/xxgktree.html?parentChannelId=302f1736b57c49d0bb6334d24165972b>)  
285. Hejin Municipal Health Commission (<http://www.sxhj.gov.cn/index.php>)  
286. Hezhong Municipal Health Commission (<http://wjw.sxz.gov.cn/>)  
287. Health Commission of Pingyao County (<http://www.pingyao.gov.cn/>)  
288. Linfen Municipal Health Commission (<http://www.linfen.gov.cn/wjw/>)  
289. Yuncheng Municipal Health Commission (<https://wsjkw.yuncheng.gov.cn/>)  
290. Health Commission of Ruicheng County (<http://www.rcx.gov.cn/>)  
291. Health Commission of Wanrong County (<https://www.wanrong.gov.cn/index.htm>)  
292. Health Commission of Xia County (<http://www.sxxixian.gov.cn/>)  
293. Health Commission of Xinjiang County (<http://www.jiangzhou.gov.cn/>)  
294. Lvliang Municipal Health Commission (<http://www.lvliang.gov.cn/>)  
295. Health Commission of Wenshui County (<http://www.wenshui.gov.cn/>)  
296. Taiyuan Municipal Health Commission (<http://wjw.taiyuan.gov.cn/>)  
297. Xiaoyi Municipal Health Commission (<http://www.xiaoyi.gov.cn/xxgk/zwzt/yqfk/>)  
298. Shuozhou Municipal Health Commission (<http://szxxgk.shuozhou.gov.cn/szfgzbn/szswsj/>)  
299. Health Commission of Ying County (<http://www.yingxian.gov.cn/>)  
300. Health Commission of Tibetan Qiang Autonomous Prefecture of Ngawa (<http://wjw.abazhou.gov.cn/>)  
301. Bazhong Municipal Health Commission (<http://wsjkw.cnbz.gov.cn/index.html>)  
302. Chengdu Municipal Health Commission (<http://cdwjw.chengdu.gov.cn/>)  
303. Dazhou Municipal Health Commission (<http://wjw.dazhou.gov.cn/>)  
304. Deyang Municipal Health Commission (<https://wjw.deyang.gov.cn/>)  
305. Health Commission of Tibetan Autonomous Prefecture of Garzê (<http://wjw.gzz.gov.cn/>)  
306. Guang'an Municipal Health Commission (<http://wjw.guang-an.gov.cn/>)  
307. Guangyuan Municipal Health Commission (<http://wsjsw.cngy.gov.cn/>)  
308. Leshan Municipal Health Commission (<http://swjj.leshan.gov.cn/>)  
309. Liangshan Municipal Health Commission (<http://wjw.lsz.gov.cn/>)  
310. Luzhou Municipal Health Commission (<http://wjw.luzhou.gov.cn/>)  
311. Meishan Municipal Health Commission (<http://swjw.ms.gov.cn/>)  
312. Mianyang Municipal Health Commission (<http://wjw.my.gov.cn/>)  
313. Nanchong Municipal Health Commission (<http://wsjsw.nanchong.gov.cn/>)  
314. Neijiang Municipal Health Commission (<http://wsj.neijiang.gov.cn/>)  
315. Panzhihua Municipal Health Commission (<http://wjw.panzhihua.gov.cn/>)  
316. Suining Municipal Health Commission (<http://swjw.suining.gov.cn/>)  
317. Ya'an Municipal Health Commission (<http://wjw.yaan.gov.cn/>)  
318. Yibin Municipal Health Commission (<http://ybwjw.yibin.gov.cn/>)  
319. Zigong Municipal Health Commission (<http://www.zg.gov.cn/web/swsjsw>)  
320. Ziyang Municipal Health Commission (<http://swjw.ziyang.gov.cn/>)  
321. Lhasa Municipal Health Commission (<http://www.lasa.gov.cn/lasa/c101149/lsfyzt.shtml>)  
322. Urumqi Municipal Health Commission  
([http://www.urumqi.gov.cn/info/iIndex.jsp?cat\\_id=15790&from=message&isappinstalled=0](http://www.urumqi.gov.cn/info/iIndex.jsp?cat_id=15790&from=message&isappinstalled=0))  
323. Health Commission of Yili Prefecture (<http://www.xjyl.gov.cn/index.htm>)  
324. Baoshan Municipal Health Commission (<http://www.baoshan.gov.cn/bmym/bsswsjkwyh.htm>)  
325. Health Commission of Chuxiong (<http://wjw.cxz.gov.cn/>)  
326. Health Commission of Dali Bai Autonomous Prefecture (<http://www.dali.gov.cn/dlrmzf/index.shtml>)  
327. Health Commission of Dehong Autonomous Prefecture (<http://www.dh.gov.cn/wjw/web/>)  
328. Health Commission of Hani-Yi Autonomous Prefecture of Honghe  
(<http://www.hh.gov.cn/xxgk/xxgkndbg/zjbm/zwsjsw/>)  
329. Jinghong Municipal Health Commission (<https://www.jhs.gov.cn/index.dhtml>)  
330. Kunming Municipal Health Commission (<http://wsjkw.km.gov.cn/>)  
331. Lijiang Municipal Health Commission (<http://www.lijiang.gov.cn/>)  
332. Lincang Municipal Health Commission (<http://www.lincang.gov.cn/lcsmzf/18500/index.html>)  
333. Health Commission of Nujiang of the Lisu Autonomous Prefecture (<http://www.nujiang.gov.cn/wsjkwyh/>)

---

- 
- 334. Puer Municipal Health Commission (<http://www.puershi.gov.cn/index.htm>)
  - 335. Qujing Municipal Health Commission (<http://www.qj.gov.cn/html/bmdt2/wsj/>)
  - 336. Ruili Municipal Health Bureau (<http://www.rl.gov.cn/Web/index.aspx>)
  - 337. Tengchong Municipal Health Commission (<http://www.tengchong.gov.cn/>)
  - 338. Health Commission of Wenshan Zhuang and Miao Autonomous Prefecture (<http://www.ynws.gov.cn/>)
  - 339. Health Commission of Dai Autonomous Prefecture of Xishuangbanna (<https://wjw.xsbn.gov.cn/index.dhtml>)
  - 340. Xuanwei Municipal Health Commission (<http://www.xw.gov.cn/>)
  - 341. Yuxi Municipal Health Commission (<http://www.yuxi.gov.cn/>)
  - 342. Zhaotong Municipal Health Commission (<http://www.zt.gov.cn/>)
  - 343. Hangzhou Municipal Health Commission (<http://wsjkw.hangzhou.gov.cn/>)
  - 344. Jiaxing Municipal Health Commission (<http://wsjkw.jiaxing.gov.cn/>)
  - 345. Jinhua Municipal Health Commission (<http://wjw.jinhua.gov.cn/zwgk/gknb/public.html>)
  - 346. Lishui Municipal Health Commission (<http://wsjsw.lishui.gov.cn/>)
  - 347. Ningbo Municipal Health Commission (<http://wjw.ningbo.gov.cn/>)
  - 348. Quzhou Municipal Health Commission (<http://wjw.qz.gov.cn/>)
  - 349. Shaoxing Municipal Health Commission (<http://sxws.sx.gov.cn/>)
  - 350. Taizhou Municipal Health Commission (<http://wsjkw.zjtz.gov.cn/index.php>)
  - 351. Wenzhou Municipal Health Commission (<http://wjw.wenzhou.gov.cn/>)
  - 352. Zhoushan Municipal Health Commission (<http://wsjkw.zhoushan.gov.cn/>)
- 

Type II: Websites of officially affiliated institution of national, provincial, and municipal authorities

- 1. Anqing News Network (<http://www.aqnews.com.cn/>)
  - 2. Bengbu News Network(<http://www.bbnews.cn/>)
  - 3. Bozhou News Network (<http://www.bozhou.cn/>)
  - 4. Chizhou News Network (<http://www.chiznews.com/>)
  - 5. Chuzhou Network (<http://www.chuzhou.cn/>)
  - 6. Fuyang News Network (<https://www.fynews.net/>)
  - 7. Hefei Online (<http://www.hf365.com/>)
  - 8. Huaibei News Network (<http://www.hbnews.net/>)
  - 9. Huainan Network (<http://www.huainannet.com/>)
  - 10. Huangshan News Network (<http://www.hsnewsnet.com/>)
  - 11. Luan News Network (<http://www.luaninfo.com/>)
  - 12. Maanshan Daily ([http://epaper2.wjol.net.cn/epaper/masrb/pc/layout/202002/12/node\\_1.html](http://epaper2.wjol.net.cn/epaper/masrb/pc/layout/202002/12/node_1.html))
  - 13. Suzhou News Network (<http://www.ahsz.tv/>)
  - 14. Tongling News Network (<http://www.tlnews.cn/>)
  - 15. Wuhu News Network (<http://www.wuhunews.cn/>)
  - 16. Xvancheng News Network(<http://www.newsxc.com/>)
  - 17. Beijing Daily ([http://bjrb.bjd.com.cn/html/2020-02/12/node\\_1.htm](http://bjrb.bjd.com.cn/html/2020-02/12/node_1.htm))
  - 18. Chongqing Daily (<https://www.cqrb.cn/>)
  - 19. Fuzhou News Network (<http://www.fznews.com.cn/>)
  - 20. Minxi Daily ([http://www.mxr.cn/dzb/mxrb/2020-02/12/node\\_01.html](http://www.mxr.cn/dzb/mxrb/2020-02/12/node_01.html))
  - 21. Minbei Daily ([http://mbrb.greatwuyi.com/202002/12/node\\_1.html](http://mbrb.greatwuyi.com/202002/12/node_1.html))
  - 22. Ningde Network (<http://www.ndwww.cn/>)
  - 23. Quanzhou Evening News ([http://szb.qzwb.com/qzwb/html/2020-02/12/node\\_2.htm](http://szb.qzwb.com/qzwb/html/2020-02/12/node_2.htm))
  - 24. Sanming Daily([http://smrb.smnet.com.cn/pc/layout/202002/12/node\\_A1.html](http://smrb.smnet.com.cn/pc/layout/202002/12/node_A1.html))
  - 25. Xiamen Daily (<http://epaper.xmnn.cn/xmrb/20200212/>)
  - 26. Zhangzhou News Network(<http://www.zznews.cn/>)
  - 27. Baiyin Daily (<http://www.bynews.com.cn/>)
  - 28. Xiangbala Online--Gannan Daily (<http://www.gnxbllx.com/>)
  - 29. Jingchang News Network (<http://www.jinchangnews.cn/>)
  - 30. Lanzhou Daily ([http://rb.lzbs.com.cn/html/2020-02/12/node\\_43.htm](http://rb.lzbs.com.cn/html/2020-02/12/node_43.htm))
  - 31. National Daily ([http://szb.chinalxnet.com/html/2020-02/12/node\\_2.htm](http://szb.chinalxnet.com/html/2020-02/12/node_2.htm))
  - 32. Longnan Daily (<http://lnb.gansudaily.com.cn/>)
  - 33. Pingliang News Network (<http://www.plxww.com/>)
  - 34. Qingyang Network (<http://www.qingyangwang.com.cn/>)
  - 35. New Tianshui (<http://www.tsrb.com.cn/>)
  - 36. Dingxi Daily (<http://szb.dingxidaily.com/rb/20200212/Page01IP.htm>)
  - 37. Gansu Zhangye Network (<http://www.zyrb.com/>)
  - 38. Chaozhou Daily (<http://www.chaozhoudaily.com/>)
  - 39. Dongguan Daily (<http://epaper.timedg.com/>)
  - 40. Foshan Daily ([http://epaper.fsonline.com.cn/fsrb/html/2020-02/12/node\\_1.htm?v=1](http://epaper.fsonline.com.cn/fsrb/html/2020-02/12/node_1.htm?v=1))
  - 41. Guangzhou Daily (<https://www.gzdaily.cn/amucsite/web/index.html#/home>)
  - 42. Huizhou Daily ([http://e.hznews.com/hzrb/pc/202002/12/node\\_A01.html](http://e.hznews.com/hzrb/pc/202002/12/node_A01.html))
  - 43. Jiangmen Daily ([http://dzb.jmrb.com:8080/jmrb/html/2020-02/12/node\\_22.htm](http://dzb.jmrb.com:8080/jmrb/html/2020-02/12/node_22.htm))
  - 44. Jieyang Daily (<http://jyrb.jynews.net/>)
  - 45. Maoming Network (<http://www.mm111.net/>)
  - 46. Meizhou Daily ([http://mzrb.meizhou.cn/html/2020-02/12/node\\_2.htm](http://mzrb.meizhou.cn/html/2020-02/12/node_2.htm))
  - 47. Qingyuan Daily (<http://www.qyrb.com/>)
  - 48. Dahua Network (<http://www.dahuawang.com/>)
  - 49. Shanwei Daily (<http://www.shanweinews.net/>)
  - 50. Shaoguan Daily ([http://sgrb.sgxx.cn/html/2020-02/12/node\\_1.htm](http://sgrb.sgxx.cn/html/2020-02/12/node_1.htm))
  - 51. Shenzhen News Network (<http://www.sznews.com/>)
  - 52. Yangjiang News Network (<http://www.yjrb.com.cn/>)
  - 53. Zhanjiang News Network (<http://www.gdzjdaily.com.cn/>)
-

- 
54. Xi'jiang Network (<http://www.xjrb.com/>)
  55. Zhongshan Daily (<http://epaper.zsnews.cn/epaper/zsrp/paperdate/20200212.html>)
  56. Zhuhai Daily ([http://zhuhaidaily.hizh.cn/html/2020-02/12/node\\_1.htm?v=1](http://zhuhaidaily.hizh.cn/html/2020-02/12/node_1.htm?v=1))
  57. Baise News Network (<http://www.bsyjrb.com/>)
  58. Beihai News Network (<http://www.bhxww.com/>)
  59. Fangchenggang News Network (<http://www.fcgsnews.com/>)
  60. Guilin Daily ([http://epaper.guilinlife.com/glrp/html/2020-02/12/node\\_2.htm](http://epaper.guilinlife.com/glrp/html/2020-02/12/node_2.htm))
  61. Hechi Daily ([http://hcrb.hcwang.cn/html/2020-02/12/node\\_1.htm](http://hcrb.hcwang.cn/html/2020-02/12/node_1.htm))
  62. Hezhou Daily (<http://www.chhzm.com/szb/lzrb/content/20200211/Page01BC.htm>)
  63. Liuzhou Daily ([http://szb.lznews.gov.cn/lzrb/html/2020-02/12/node\\_9.htm](http://szb.lznews.gov.cn/lzrb/html/2020-02/12/node_9.htm))
  64. Nanning Daily (<http://www.nnrp.com.cn/pcindex.jsp>)
  65. Qinzhou News Network (<http://www.gxqzxw.com/>)
  66. Wuzhou Daily ([http://www.wuzhoudaily.com.cn/html/2020-02/12/node\\_3.htm](http://www.wuzhoudaily.com.cn/html/2020-02/12/node_3.htm))
  67. Yulin News Network (<http://www.gxylnews.com/>)
  68. Anshun News Network (<http://www.asxw.net/>)
  69. Bijie Daily ([http://rb.bjrb.cn/html/2020-02/13/node\\_1.htm](http://rb.bjrb.cn/html/2020-02/13/node_1.htm))
  70. Guiyang Daily ([http://epaper.gywb.cn/epaper/gyrb/html/2020-02/13/node\\_301.htm](http://epaper.gywb.cn/epaper/gyrb/html/2020-02/13/node_301.htm))
  71. Liupanshui Daily ([http://epaper.lpswz.com/lpsrb/html/2020-02/13/node\\_3.htm](http://epaper.lpswz.com/lpsrb/html/2020-02/13/node_3.htm))
  72. Qiandongnan Daily (<http://dzb.qdnrbs.cn/szb/pc/202002/13/101.html>)
  73. Wuhan Evening News ([http://whwb.cjn.cn/html/2020-01/23/node\\_73.htm](http://whwb.cjn.cn/html/2020-01/23/node_73.htm))
  74. Qiannan Daily ([http://cnpaper.com/qnrp/html/2020-02/13/node\\_1.htm](http://cnpaper.com/qnrp/html/2020-02/13/node_1.htm))
  75. Qianxinan Daily ([http://www.qxnrb.com/epaper/qxnrb/html/2020-02/13/node\\_269.htm](http://www.qxnrb.com/epaper/qxnrb/html/2020-02/13/node_269.htm))
  76. Tongren Daily (<http://szb.trxw.gov.cn/epaper/uniflows/html/2020/02/13/01/default.htm>)
  77. Zunyi Daily ([http://cnpaper.com/zyrbszb/html/2020-02/13/node\\_1.htm](http://cnpaper.com/zyrbszb/html/2020-02/13/node_1.htm))
  78. Baoting News (<http://baoting.hinews.cn/>)
  79. Changjiang News (<http://changjiang.hinews.cn/>)
  80. Chengmai News (<http://chengmai.hinews.cn/>)
  81. Danzhou News (<http://danzhou.hinews.cn/>)
  82. Dingan News (<http://dingan.hinews.cn/>)
  83. Dongfang News (<http://dongfang.hinews.cn/>)
  84. Haikou Daily ([http://szb.hkwb.net/szb/html/2020-02/13/node\\_2.htm](http://szb.hkwb.net/szb/html/2020-02/13/node_2.htm))
  85. Ledong News (<http://ledong.hinews.cn/>)
  86. Lingao News (<http://lingao.hinews.cn/>)
  87. Lingshui News (<http://lingshui.hinews.cn/>)
  88. Qionghai News (<http://qionghai.hinews.cn/>)
  89. Qiongzong News (<http://qiongzong.hinews.cn/>)
  90. Sanya Daily ([http://epaper.sanyarb.com.cn/html/2020-02/13/node\\_1.htm?v=1](http://epaper.sanyarb.com.cn/html/2020-02/13/node_1.htm?v=1))
  91. Wanning News (<http://wanning.hinews.cn/>)
  92. Wenchang News (<http://wenchang.hinews.cn/>)
  93. Baoding News (<http://bd.hebnews.cn/>)
  94. Cangzhou News Network (<http://www.cznews.gov.cn/newweb/index.html>)
  95. Hehe Chengde Network (<http://www.hehechengde.cn/>)
  96. Handan Daily ([http://szb.handannews.com.cn/rbpaper/pc/layout/202002/13/node\\_01.html](http://szb.handannews.com.cn/rbpaper/pc/layout/202002/13/node_01.html))
  97. Hengshui News Network (<http://www.hsrp.com.cn/a/>)
  98. Langfang News Network (<http://www.lfnews.cn/>)
  99. Qinhuangdao News Network (<http://www.qhdnews.com/>)
  100. Shijiazhuang Daily ([http://sjzrb.sjzdaily.com.cn/html/2020-02/13/node\\_5.htm](http://sjzrb.sjzdaily.com.cn/html/2020-02/13/node_5.htm))
  101. Tangshan Labor Daily ([http://szb.huanbohainews.com.cn/tsldrb/html/2020-02/13/node\\_19.htm](http://szb.huanbohainews.com.cn/tsldrb/html/2020-02/13/node_19.htm))
  102. Xingtai Daily ([http://www.xtrb.cn/epaper/xtrb/html/2020-02/13/node\\_61.htm](http://www.xtrb.cn/epaper/xtrb/html/2020-02/13/node_61.htm))
  103. Zhangjiakou News Network (<http://www.zjknews.com/>)
  104. Daqing Daily ([http://dqxmt.dqdaily.com/dqrb/html/2020-02/13/node\\_2.htm](http://dqxmt.dqdaily.com/dqrb/html/2020-02/13/node_2.htm))
  105. Haerbin Daily ([http://hb.my399.com/html/2020-01/24/node\\_4.htm](http://hb.my399.com/html/2020-01/24/node_4.htm))
  106. Hegang News Network (<http://hegangnews.dbw.cn/>)
  107. Jixi News Network (<https://jixi.dbw.cn/>)
  108. Mudanjiang News Network (<http://mudanjiang.dbw.cn/>)
  109. Qitaihe News Network (<http://www.qthnews.org.cn/>)
  110. Shuangyashan News Network (<http://shuangyashan.dbw.cn/>)
  111. Suihua News Network (<https://suihua.dbw.cn/>)
  112. Anyang Daily ([http://www.ayrbs.com/epaper/html/2020-02/13/node\\_2.htm](http://www.ayrbs.com/epaper/html/2020-02/13/node_2.htm))
  113. Hebi Daily (<http://paper.hebiw.com/epaper/hbrp/2020/02/13/RB01/10609726.shtml>)
  114. Jiaozuo Daily ([http://epaper.jzrb.com/html/2020-02/13/node\\_62.htm](http://epaper.jzrb.com/html/2020-02/13/node_62.htm))
  115. Kaifeng Daily ([http://kfrb.kf.cn/html/2020-02/13/node\\_4.htm](http://kfrb.kf.cn/html/2020-02/13/node_4.htm))
  116. Luohe Daily ([http://rb.lhrb.com.cn/html/2020-02/13/node\\_2.htm](http://rb.lhrb.com.cn/html/2020-02/13/node_2.htm))
  117. Luoyang Daily ([http://lyrb.lyd.com.cn/html2/2020-02/13/node\\_3.htm](http://lyrb.lyd.com.cn/html2/2020-02/13/node_3.htm))
  118. Nanyang Daily ([http://epaper.01ny.cn/http\\_rb/html/2020-02/13/node\\_5.htm](http://epaper.01ny.cn/http_rb/html/2020-02/13/node_5.htm))
  119. Sanmenxia Daily ([http://szb.westking.com/smxrb/html/2020-02/13/node\\_17.htm](http://szb.westking.com/smxrb/html/2020-02/13/node_17.htm))
  120. Shangqiu Network (<http://www.sqrb.com.cn/>)
  121. Xinxiang Daily ([http://rb.xxr.com.cn/html/2020-02/13/node\\_3.htm](http://rb.xxr.com.cn/html/2020-02/13/node_3.htm))
  122. Xinyang Daily ([http://ribao.xyxww.com.cn/html/2020-02/13/node\\_2.htm](http://ribao.xyxww.com.cn/html/2020-02/13/node_2.htm))
  123. Xvchang Network (<http://www.21xc.com/>)
-



124. Zhengzhou Daily ([https://zzrb.zynews.cn/html/2020-02/13/node\\_3.htm](https://zzrb.zynews.cn/html/2020-02/13/node_3.htm))  
 125. Zhoukou Daily ([http://www.zhld.com/zkrb/html/2017-12/30/node\\_41.htm](http://www.zhld.com/zkrb/html/2017-12/30/node_41.htm))  
 126. Zhumadian Daily (<http://zmdrb.zmdnews.cn/zmdrb/20200213/html/index.htm>)  
 127. Huanggang News Network (<http://www.hgdaily.com.cn/>)  
 128. Huangshi News Network (<http://www.hsdcw.com/>)  
 129. Jingzhou Daily (<http://www.cnchu.com/>)  
 130. Shiyang Daily (<http://syrb.10yan.com/>)  
 131. Tianmen Network (<http://www.tmwcn.com/>)  
 132. Xiangyang Daily (<http://xfrb.hj.cn/>)  
 133. Xianning Daily ([http://szb.xnnews.com.cn/xnrb/html/2020-02/13/node\\_5.htm](http://szb.xnnews.com.cn/xnrb/html/2020-02/13/node_5.htm))  
 134. Xiaogan Network (<http://www.xgrb.cn/>)  
 135. Sanxia Yichang Network (<http://www.cn3x.com.cn/>)

### Completeness of the individual records

We assessed the completeness of all variables that included in this study (Tab. S2). The completeness of variables that related to cases' demographic (e.g., age and sex), time and location of case detected, exposures potentially related to COVID-19 were higher (range: 94.1-100%), while the time involving in estimates of key epidemiologic parameters of time to event distributions (i.e., the date of symptom onset, first healthcare consultation, and hospital admission) can be found in 45.5-93.4% of the COVID-19 cases.

**Table S2. Completeness assessment of variables used in the study.**

| Variable                                 | Outside Hubei<br>(n=8,579) |
|------------------------------------------|----------------------------|
| Age                                      | 94.1%                      |
| Sex                                      | 97.3%                      |
| Location of case detection at city level | 99.6%                      |
| Exposure history*                        | 100%                       |
| Date of symptom onset                    | 66.2%                      |
| Date of first healthcare consultation    | 47.2%                      |
| Date of hospital admission               | 45.5%                      |
| Date of official announcement            | 93.4%                      |

\*We collected three types of potential exposure, including exposure to animals and seafood markets, or wild animals, or exposure to COVID-19 cases or patients with acute respiratory infection, or exposure to Wuhan/Hubei as we used in Table 1. According to the definition of suspected case that we described in page 1 of the Appendix, a suspected case should have an epidemiological link to Wuhan/Hubei (including travel history to Wuhan/Hubei or direct contact with patients from Wuhan/Hubei) or to be a potential case in a cluster. Thus, if no information about the travel history to Wuhan/Hubei of a confirmed case is reported in our individual records, we assume that the case locally acquired the infection. For exposure history, especially travel history to Wuhan/Hubei, it is 100% complete.

### Data consistence between our individual records and official line list

Considering more information on epidemiological investigation of the individual case were deeply revealed over time, we compared our real-time individual records that collected from official public source with official line list which released by Shandong Provincial Health Commission, Shenzhen Municipal Health Commission, and Hunan Provincial Health Commission since Jan 30, 2020. Individual records were then matched to the official line list according to the information on cases' demographic (i.e., age and sex), time and location of case detected. Individual records between our individual records and official line list were identified as the same individual if the records matched on cases' gender, age (less than 1-year-old), and official announcement (less than 1 day). Additionally, after observing the differences of the date of official announcement between municipal and provincial health commissions, a two-day lag of the date of official announcement was considered when comparing individual records in our study and official line list. Overall, a total of 299 cases in Hunan province, 302 cases in Shandong province and 312 cases in Shenzhen city were matched, respectively. The consistence of cases' demographic and the time involving in estimates of key epidemiologic parameters of time to event distributions are relatively higher (70.9-100.0%) between our individual records and official line list, while the consistence of the timing of case detected in Shandong province was relatively lower since the two-day lag of the date of official announcement was observed between provincial and municipal authorities. After cases matching and selecting, cases included in the official line list that could not be matched with our individual records were merged in our individual records, corresponding to 87 records in Shenzhen city (21.6% of total number of cases) and 17 records in Shandong province (3.3% of total number of cases) as of February 14, 2020.

**Table S3. Consistence between our individual records and official line list for the key variables.**

| Variable                                                                   | Consistence rate (%)      |                              |                          |
|----------------------------------------------------------------------------|---------------------------|------------------------------|--------------------------|
|                                                                            | Hunan Province<br>(n=299) | Shandong Province<br>(n=302) | Shenzhen City<br>(n=312) |
| Age                                                                        |                           |                              |                          |
| Non-missing in our individual records and official data (% ,no./Total no.) | 87.6 (262/299)            | 99.3 (300/302)               | 100 (312/312)            |
| No difference                                                              | 79.8 (209/262)            | 99.0 (297/300)               | 99.7 (311/312)           |
| Difference between -1 and 1 year old                                       | 20.2 (53/262)             | 0.7 (2/300)                  | 0.3 (1/312)              |
| Missing in our individual records (% ,no./Total no.)                       | 12.4 (37/299)             | 0.7 (2/302)                  | 0 (0/312)                |
| Sex                                                                        |                           |                              |                          |
| Non-missing in our individual records and official data (% ,no./Total no.) | 100 (299/299)             | 99.3 (300/302)               | 100 (312/312)            |
| Missing in our individual records (% ,no./Total no.)                       | 0 (0/299)                 | 0 (0/302)                    | 0 (0/312)                |

|                                                                            |                |                |                |
|----------------------------------------------------------------------------|----------------|----------------|----------------|
| Date of symptom onset                                                      |                |                |                |
| Non-missing in our individual records and official data (% ,no./Total no.) | 70.9 (212/299) | 54.0 (163/302) | 96.2 (300/312) |
| No difference                                                              | 90.1 (191/212) | 93.9 (153/163) | 99.7 (299/300) |
| Difference between -1 and 1 day                                            | 9.0 (19/212)   | 1.8 (3/163)    | 0.3 (1/300)    |
| Missing in our individual records (% ,no./Total no.)                       | 29.1 (87/299)  | 44.4 (134/302) | 3.5 (11/312)   |
| Date of first healthcare consultation                                      |                |                |                |
| Non-missing in our individual records and official data (% ,no./Total no.) | 18.4 (55/299)  | -              | -              |
| No difference                                                              | 70.9 (39/55)   | -              | -              |
| Difference between -1 and 1 day                                            | 20.0 (11/55)   | -              | -              |
| Missing in our individual records (% ,no./Total no.)                       | 75.9 (227/299) | -              | -              |
| Date of hospital admission                                                 |                |                |                |
| Non-missing in our individual records and official data (% ,no./Total no.) | 47.8 (143/299) | -              | 79.2 (247/312) |
| No difference                                                              | 75.5 (108/143) | -              | 100 (247/247)  |
| Difference between -1 and 1 day                                            | 20.3 (29/143)  | -              | -              |
| Missing in our individual records (% ,no./Total no.)                       | 50.8 (152/299) | -              | 20.8 (65/312)  |
| Date of official announcement                                              |                |                |                |
| Non-missing in our individual records and official data (% ,no./Total no.) | -              | 98.0 (296/302) | -              |
| No difference                                                              | -              | 1.0 (3/296)    | -              |
| Difference between -2 and 2 days                                           | -              | 98.0 (290/296) | -              |
| Missing in our individual records (% ,no./Total no.)                       | -              | 1.7 (5/302)    | -              |

Note: reduced denominators indicate the difference above one day but less than two days

### Data representativeness

Tab. S4 shows a comparison between the number of confirmed cases by province (excluding Hubei) in our individual records and the total number of confirmed cases officially announced as of February 17, 2020. Figure S1 shows a comparison between the time series derived from our individual records and the officially announced cases for: i) all provinces of mainland China (except Hubei), and ii) seven of the most affected areas of mainland China (excluding Hubei Province). The estimation of the net reproduction number  $R_t$  was conducted on these seven locations and on the three additional locations that were validated against the official line list (see previous section).

**Table. S4. Proportion of cases with individual data among total confirmed cases of COVID-19 by province/municipality in mainland China outside Hubei Province as of Feb 17, 2020. The 10 locations selected for the analysis on  $R_t$  are highlighted in bold.**

| Province/ municipality         | No. of cases with individual data | No. of total confirmed cases | Proportion (%) |
|--------------------------------|-----------------------------------|------------------------------|----------------|
| Mainland China excluding Hubei | 8,579                             | 12,447                       | 68.9           |
| Province                       |                                   |                              |                |
| Guangdong                      | 867                               | 1,328                        | 65.3           |
| <b>Shenzhen city</b>           | <b>401</b>                        | <b>416</b>                   | <b>96.4</b>    |
| <b>Outside Shenzhen city</b>   | <b>464</b>                        | <b>912</b>                   | <b>50.9</b>    |
| Unknown city                   | 2                                 | NA                           | NA             |
| <b>Henan</b>                   | <b>759</b>                        | <b>1,257</b>                 | <b>60.4</b>    |
| <b>Zhejiang</b>                | <b>1,007</b>                      | <b>1,172</b>                 | <b>85.9</b>    |
| <b>Hunan</b>                   | <b>746</b>                        | <b>1,007</b>                 | <b>74.1</b>    |
| <b>Anhui</b>                   | <b>865</b>                        | <b>982</b>                   | <b>88.1</b>    |
| <b>Jiangxi</b>                 | <b>792</b>                        | <b>933</b>                   | <b>84.9</b>    |
| <b>Jiangsu</b>                 | <b>611</b>                        | <b>629</b>                   | <b>97.1</b>    |
| Chongqing                      | 28                                | 553                          | 5.1            |
| <b>Shandong</b>                | <b>522</b>                        | <b>543</b>                   | <b>96.1</b>    |
| Sichuan                        | 192                               | 508                          | 37.8           |
| Heilongjiang                   | 92                                | 464                          | 19.8           |
| Beijing                        | 204                               | 387                          | 52.7           |
| Shanghai                       | 138                               | 333                          | 41.4           |
| Hebei                          | 263                               | 302                          | 87.1           |
| Fujian                         | 89                                | 292                          | 30.5           |
| Guangxi                        | 154                               | 242                          | 63.6           |
| <b>Shaanxi</b>                 | <b>224</b>                        | <b>240</b>                   | <b>93.3</b>    |
| Yunnan                         | 115                               | 172                          | 66.9           |
| Hainan                         | 153                               | 163                          | 93.9           |
| Guizhou                        | 143                               | 146                          | 97.9           |
| Shanxi                         | 74                                | 130                          | 56.9           |
| Tianjin                        | 120                               | 125                          | 96             |

---

|                |     |     |      |
|----------------|-----|-----|------|
| Liaoning       | 120 | 121 | 99.2 |
| Gansu          | 85  | 91  | 93.4 |
| Jilin          | 89  | 89  | 100  |
| Xinjiang       | 13  | 76  | 17.1 |
| Inner Mongolia | 31  | 73  | 42.5 |
| Ningxia        | 65  | 70  | 92.9 |
| Qinghai        | 17  | 18  | 94.4 |
| Tibet          | 0   | 1   | 0    |

---

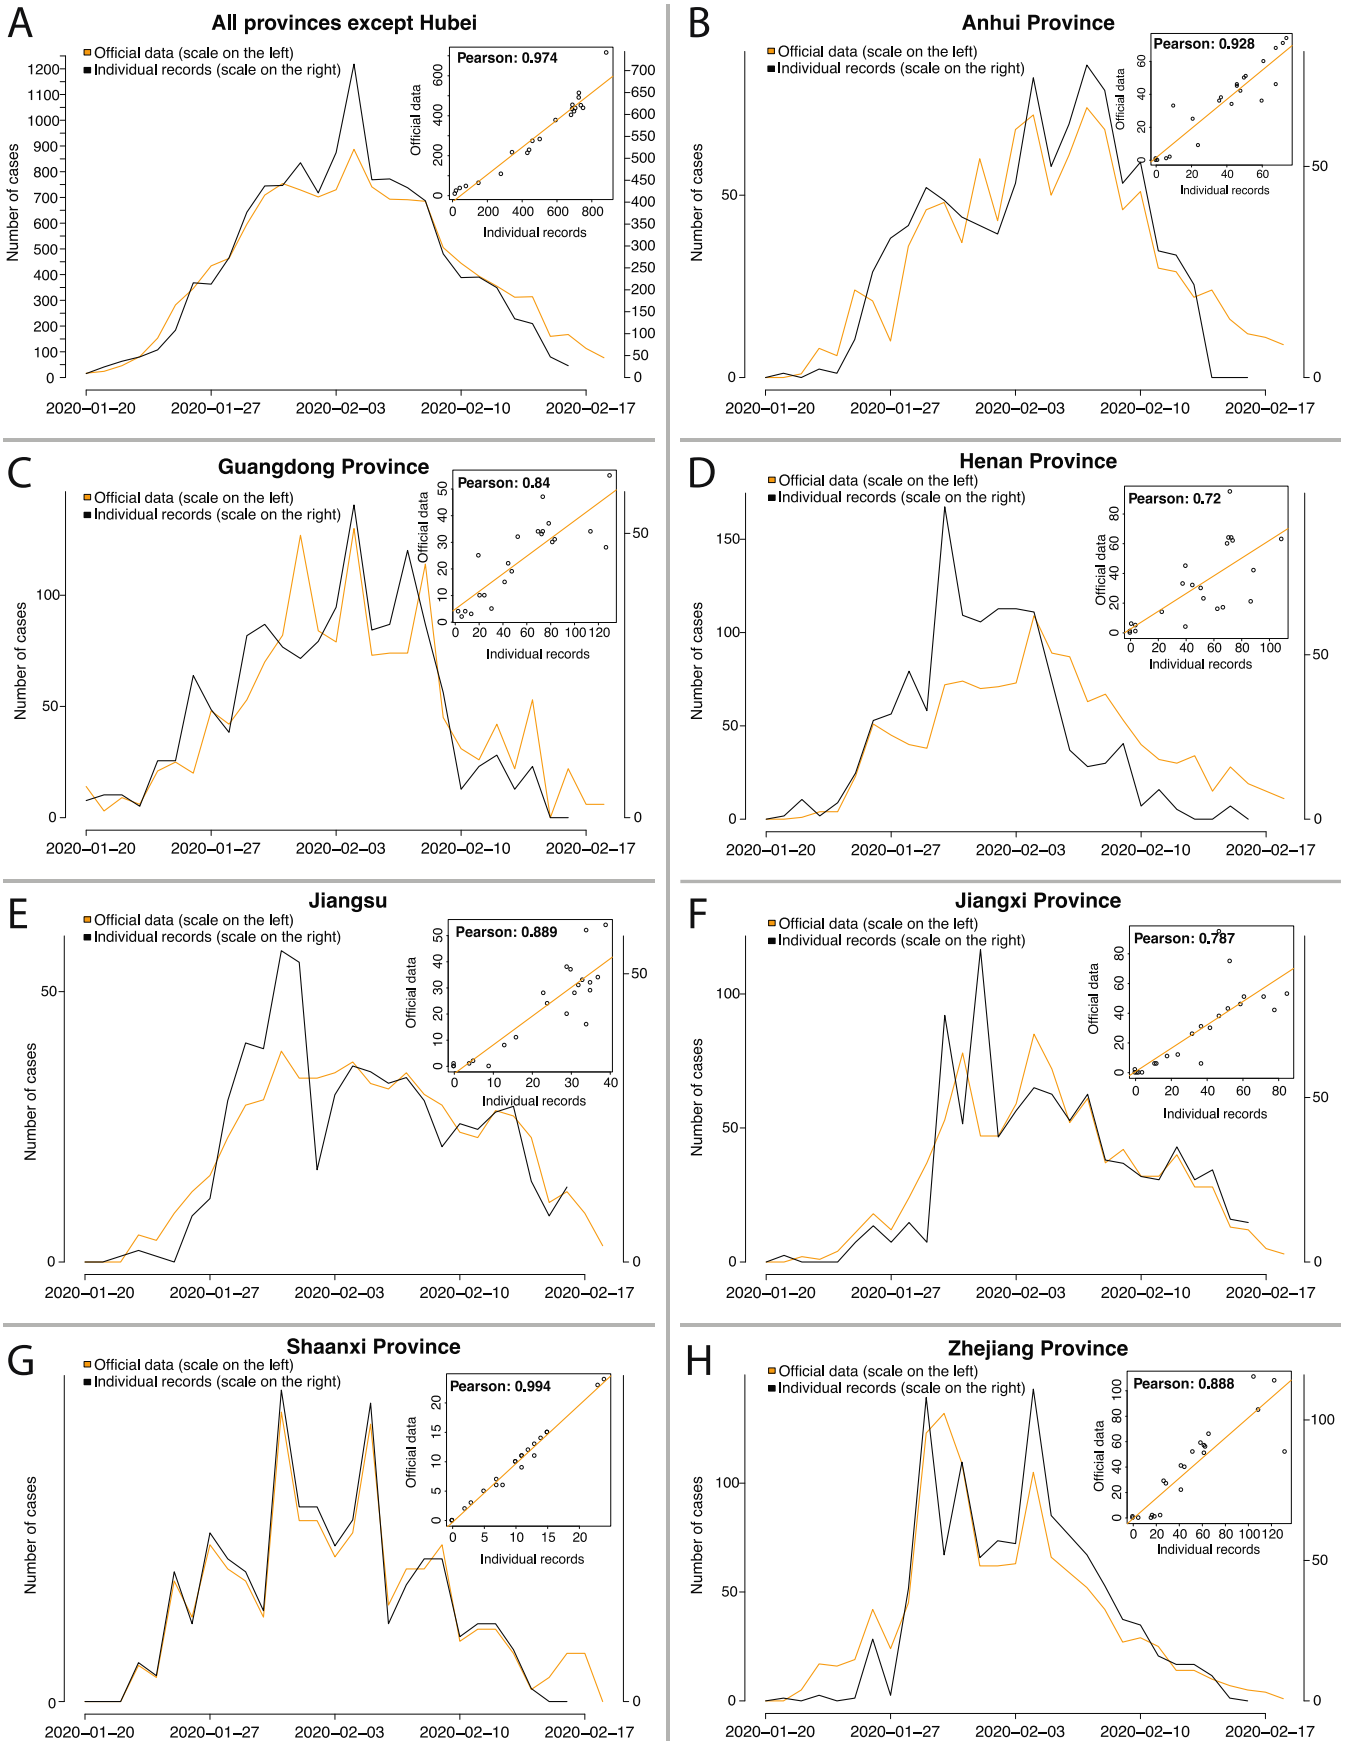

**Figure. S1. A** Time series of confirmed cases (date of reporting) as resulting from our individual records and official announcements for all provinces of mainland China except Hubei. The inset shows a scatter plot of the two time series and the value of the Pearson's correlation coefficient. **B-H** Same as **A**, but for Anhui Province, Guangdong Province, Henan Province, Jiangsu Province, Jiangxi Province, Shaanxi Province, and Zhejiang Province, respectively.

### Age and sex distribution of cases

The age and sex distributions of COVID-19 cases disaggregated by epidemic period in Fig. S2.

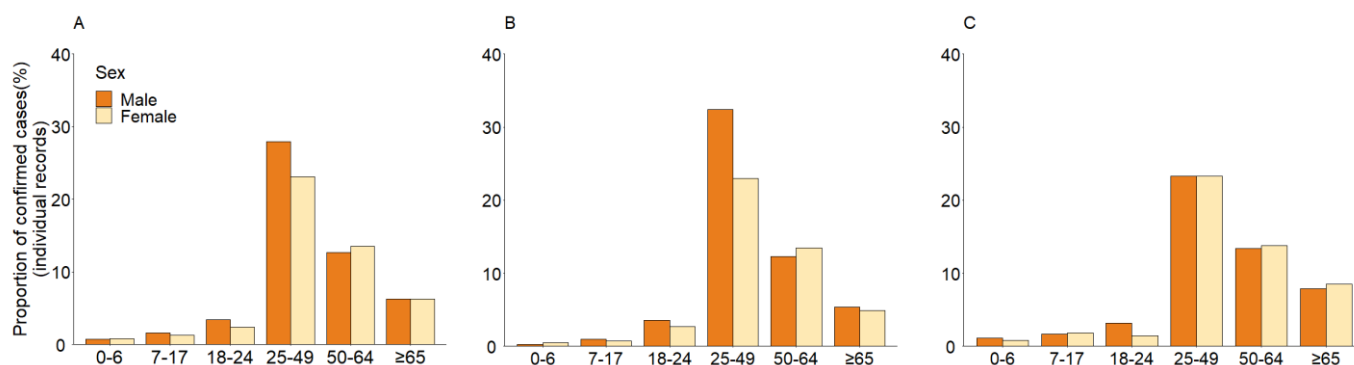

**Figure. S2. Age and sex distribution of cases in provinces outside Hubei, stratified by epidemic period. A: Overall (n=7,936); B: Period 1 (n=3,820); C: Period 2 (n=2,270).**

### Key time to event intervals variable over time

We analyzed the individual records to obtain information about the following key time intervals:

- (1) Time from symptom onset to first healthcare consultation;
- (2) Time from symptom onset to hospital admission;
- (3) Time from first healthcare consultation to hospital admission;
- (4) Time from symptom onset to case announcement;

These time intervals may greatly depend on the behavior of the population, its response to the unfolding outbreak, and the local health care infrastructure. Therefore, we estimate provide different estimates for the two consider time periods of the epidemic.

We use maximum likelihood estimation to find the optimal parameters for the gamma, lognormal, and Weibull distributions. The fits of the three distributions are compared in terms of Akaike information criterion (AIC). The obtained results are reported in Tab. S5-S8.

**Table. S5. Estimation of the distribution of the time from symptom onset to first healthcare consultation.**

| Distribution                                                           | All                            | Period of the epidemic       |                               |
|------------------------------------------------------------------------|--------------------------------|------------------------------|-------------------------------|
|                                                                        |                                | Period 1<br>Until Jan 27     | Period 2<br>Jan 28 – Feb 17   |
| <b>Time from symptom onset to first healthcare consultation (days)</b> |                                |                              |                               |
| Number of observations                                                 | 2888                           | 1836                         | 1052                          |
| <b>Empirical data</b>                                                  | 2.5 (95%CI:0.0-10.0)           | 3.0 (95%CI:0.0-11.1)         | 1.6 (95%CI:0.0-7.0)           |
| <b>Gamma</b>                                                           |                                |                              |                               |
| summary                                                                | 2.6 (95%CI:0.01-12.3)          | 3.1 (95%CI:0.02-12.8)        | 1.6 (95%CI:0.006-7.5)         |
| parameters                                                             | shape = 0.60, rate = 0.24      | shape = 0.62, rate = 0.20    | shape = 0.62, rate = 0.37     |
| AIC                                                                    | 10566.2                        | 7436.8                       | 2996.5                        |
| <b>Weibull</b>                                                         |                                |                              |                               |
| summary                                                                | 2.7 (95%CI:0.01-12.9)          | 3.3 (95%CI:0.02-17.0)        | 1.6 (95%CI:0.01-8.2)          |
| parameters                                                             | scale = 2.08, shape = 0.71     | scale = 2.58, shape = 0.74   | scale = 1.37, shape = 0.72    |
| AIC                                                                    | 10596.1                        | 7481.9                       | 2989.2                        |
| <b>Lognormal</b>                                                       |                                |                              |                               |
| summary                                                                | 3.8 (95%CI:0.03-25.2)          | 4.9 (95%CI:0.04-33.3)        | 2.4 (95%CI:0.03-14.0)         |
| parameters                                                             | meanlog = -0.092, sdlog = 1.71 | meanlog = 0.13, sdlog = 1.73 | meanlog = -0.48, sdlog = 1.61 |
| AIC                                                                    | 10776.7                        | 7708.9                       | 2978.5                        |

**Table. S6. Estimation of the distribution of the time from symptom onset to hospital admission.**

| Distribution                                                | All                          | Period of the epidemic       |                              |
|-------------------------------------------------------------|------------------------------|------------------------------|------------------------------|
|                                                             |                              | Period 1<br>Until Jan 27     | Period 2<br>Jan 28 – Feb 17  |
| <b>Time from symptom onset to hospital admission (days)</b> |                              |                              |                              |
| Number of observations                                      | 2001                         | 1310                         | 691                          |
| Empirical data                                              | 3.8 (95%CI:0.0-12.0)         | 4.4 (95%CI:0.0-14.0)         | 2.6 (95%CI:0.0-9.0)          |
| <b>Gamma</b>                                                |                              |                              |                              |
| summary                                                     | 3.8 (95%CI:0.03-17.3)        | 4.2 (95%CI:0.04-16.7)        | 2.6 (95%CI:0.01-11.6)        |
| parameters                                                  | shape = 0.74, rate = 0.20    | shape = 0.80, rate = 0.18    | shape = 0.71, rate = 0.27    |
| AIC                                                         | 9206.2                       | 6464.5                       | 2654.4                       |
| <b>Weibull</b>                                              |                              |                              |                              |
| summary                                                     | 3.8 (95%CI:0.03-15.5)        | 4.5 (95%CI:0.09-16.9)        | 2.6 (95%CI:0.03- 9.9)        |
| parameters                                                  | scale = 3.52, shape = 0.85   | scale = 4.24, shape = 0.91   | scale = 2.36, shape = 0.81   |
| AIC                                                         | 9257.7                       | 6494.6                       | 2667.2                       |
| <b>Lognormal</b>                                            |                              |                              |                              |
| summary                                                     | 6.8 (95%CI:0.07-47.3)        | 6.3 (95%CI:0.1-42.3)         | 3.8 (95%CI:0.04-27.6)        |
| parameters                                                  | meanlog = 0.52, sdlog = 1.63 | meanlog = 0.74, sdlog = 1.61 | meanlog = 0.11, sdlog = 1.60 |
| AIC                                                         | 9735.7                       | 6901.1                       | 2770.2                       |

**Table. S7. Estimation of the distribution of the time from first healthcare consultation to hospital admission.**

| Distribution                                                                | All                           | Period of the epidemic        |                               |
|-----------------------------------------------------------------------------|-------------------------------|-------------------------------|-------------------------------|
|                                                                             |                               | Period 1<br>Until Jan 27      | Period 2<br>Jan 28 – Feb 17   |
| <b>Time from first healthcare consultation to hospital admission (days)</b> |                               |                               |                               |
| Number of observations                                                      | 1725                          | 850                           | 353                           |
| Empirical data                                                              | 1.5 (95%CI:0.0-9.0)           | 1.4 (95%CI:0.0-9.0)           | 1.4 (95%CI:0.0-9.0)           |
| <b>Gamma</b>                                                                |                               |                               |                               |
| summary                                                                     | 1.6 (95%CI:6e-04-8.1)         | 1.3 (95%CI:0.0-7.0)           | 1.5 (95%CI:0.0-8.2)           |
| parameters                                                                  | shape = 0.46, rate = 0.29     | shape = 0.45, rate = 0.30     | shape = 0.50, rate = 0.35     |
| AIC                                                                         | 4063.5                        | 1879.2                        | 811.3                         |
| <b>Weibull</b>                                                              |                               |                               |                               |
| summary                                                                     | 1.6 (95%CI:0.0- 9.8)          | 1.4 (95%CI:0.0-8.7)           | 1.5 (95%CI:0.0-9.3)           |
| parameters                                                                  | scale = 0.95, shape = 0.58    | scale = 0.87, shape = 0.57    | scale = 0.95, shape = 0.61    |
| AIC                                                                         | 3874.3                        | 1772.1                        | 781.7                         |
| <b>Lognormal</b>                                                            |                               |                               |                               |
| summary                                                                     | 1.8 (95%CI:0.0-10.9)          | 1.5 (95%CI:0.0-10.5)          | 1.5 (95%CI:0.0-8.8)           |
| parameters                                                                  | meanlog = -0.94, sdlog = 1.71 | meanlog = -1.03, sdlog = 1.69 | meanlog = -0.91, sdlog = 1.65 |
| AIC                                                                         | 3486.1                        | 1553.3                        | 713.8                         |

**Table. S8. Estimation of the distribution of the time from symptom onset to official announcement.**

| Distribution                                                   | All                          | Period of the epidemic       |                              |
|----------------------------------------------------------------|------------------------------|------------------------------|------------------------------|
|                                                                |                              | Period 1<br>Until Jan 27     | Period 2<br>Jan 28 – Feb 17  |
| <b>Time from symptom onset to official announcement (days)</b> |                              |                              |                              |
| Number of observations                                         | 5024                         | 2727                         | 2079                         |
| <b>Empirical data</b>                                          | 7.4 (95% CI:1.0-18.0)        | 8.9 (95% CI:2.0-19.8)        | 5.4 (95% CI:1.0-12.0)        |
| <b>Gamma</b>                                                   |                              |                              |                              |
| summary                                                        | 7.3 (95% CI:1.4-18.8)        | 8.8 (95% CI:2.3-19.2)        | 5.3 (95% CI:1.2-13.1)        |
| parameters                                                     | shape = 2.72, rate = 0.37    | shape = 3.72, rate = 0.42    | shape = 3.18, rate = 0.59    |
| AIC                                                            | 27954.2                      | 15552.1                      | 10038.7                      |
| <b>Weibull</b>                                                 |                              |                              |                              |
| summary                                                        | 7.5 (95% CI:1.1-17.6)        | 8.9 (95% CI:1.4-18.7)        | 5.4 (95% CI:0.9-11.7)        |
| parameters                                                     | scale = 8.29, shape = 1.75   | scale = 10.05, shape = 2.09  | scale = 6.10, shape = 1.95   |
| AIC                                                            | 28054.8                      | 15585.2                      | 10040.6                      |
| <b>Lognormal</b>                                               |                              |                              |                              |
| summary                                                        | 7.5 (95% CI:1.7-21.9)        | 9.1 (95% CI:2.4-24.2)        | 5.5 (95% CI:1.2-15.0)        |
| parameters                                                     | meanlog = 1.80, sdlog = 0.68 | meanlog = 2.04, sdlog = 0.57 | meanlog = 1.52, sdlog = 0.63 |
| AIC                                                            | 28447.6                      | 15806.4                      | 10276.9                      |

### Incubation period

The estimation of the incubation period is based on the information about the likely exposure of confirmed COVID-19 cases with asserted through forward contact tracing epidemiological link and no history of travel to Wuhan/Hubei. The exposure information is provided in the form of a time interval bounded by the date of the first and last possible exposure. The dataset contains the information on both the exposure date/dates and the date of symptom onset for 49 confirmed cases belonging to 37 clusters (a group of confirmed cases identified through forward contact tracing of an index case and linked through transmission events). We estimate the distribution of the exposure left-, right-, and interval-censored data by using maximum likelihood estimation and testing three distributions (Weibull, gamma, and lognormal)<sup>6</sup>. The goodness of fit is assessed in terms of Akaike information criterion (AIC). We found that the best fit is obtained by using a Lognormal distribution (see Tab. S9). The cumulative density function best fitting the data is shown in Fig. S3.

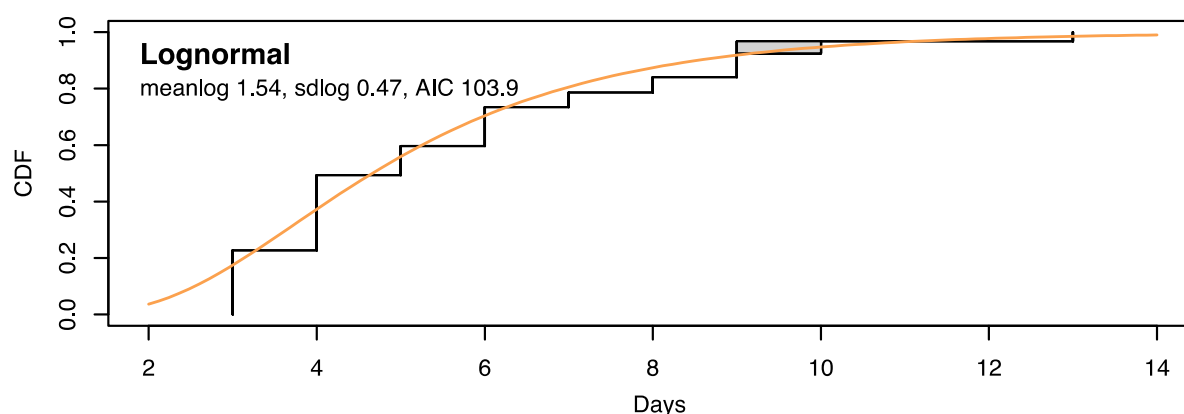

**Figure. S3. Cumulative density function of the lognormal distribution that best fits the data on the incubation period.**

**Table S9. Incubation period characteristics. Estimates based on the analysis of 37 clusters and 49 observations.**

| Distribution     | Parameters<br>mean (SD)                         | Mean (days) | 95%CI (days) | AIC   |
|------------------|-------------------------------------------------|-------------|--------------|-------|
| <b>Gamma</b>     | shape = 4.23 (1.28),<br>rate = 0.81 (0.24)      | 5.2         | 1.5 - 11.3   | 104.9 |
| <b>Weibull</b>   | scale = 5.84 (0.56),<br>shape = 2.03 (0.31)     | 5.2         | 1.0 – 10.9   | 106.8 |
| <b>Lognormal</b> | meanlog = 1.54 (0.092),<br>sdlog = 0.47 (0.072) | 5.2         | 1.8 - 12.4   | 103.9 |

## Serial interval

We estimate the serial interval by applying maximum likelihood estimation to data on dates of symptom onsets between consecutive generations of cases within clusters with known epidemiological link and no travel history to Wuhan/Hubei. We focus on the transmission events that can be clearly identified, thus we omit cases when several infectors are possible. All the clusters used in this analysis are shown in Fig. S4.

As sensitivity analysis, we consider the possibility that, although with an identified epidemiological link, cases within a cluster that develop symptoms 1 up to 3 days after the date of symptom onset of the index case may have been infected by an unidentified infector. Therefore, we estimate four distributions of the serial interval by censoring raw cluster data.

The estimated serial intervals as well as the parameters of the best fitting gamma distributions are reported in Tab. S10. The fit of the gamma distribution to the empirical data is shown in Fig. S5.

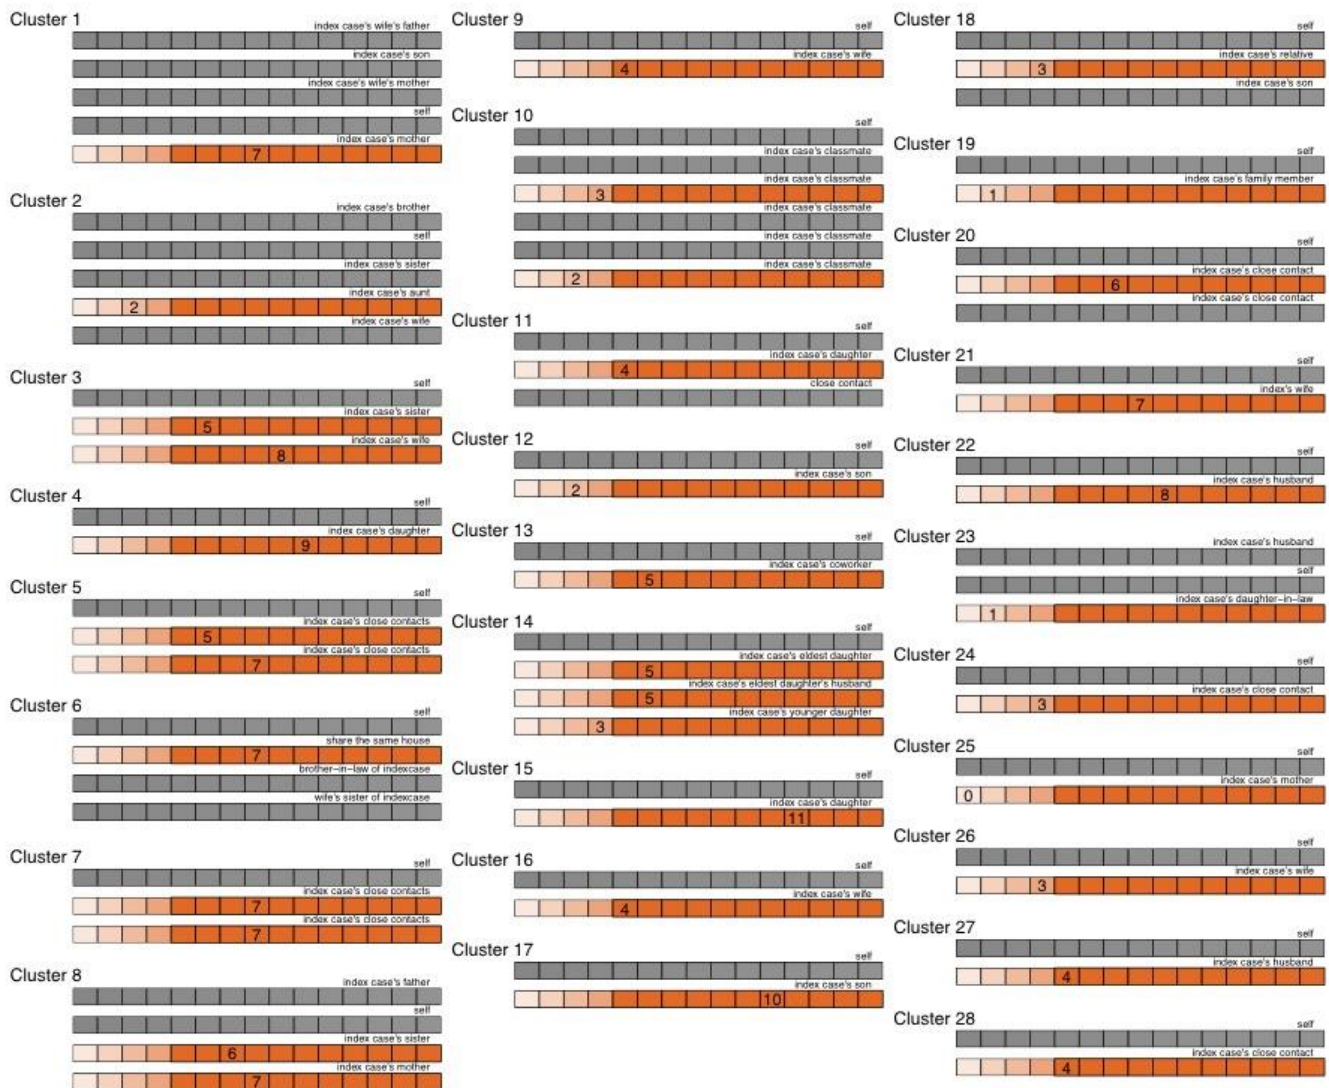

**Figure S4. Time lag between the dates of symptom onset of cluster members and cluster index case. The relation of each cluster member with the index case is reported above each case. Numbers in boxes represent the time lag expressed in days. Cases represented in grey correspond to the index cases or to individuals for which it was not possible to establish a single infector through contact investigation.**



**Table. S10. Serial interval characteristics.**

| Delay between symptom onset of index case and secondary cases | Number of clusters | Number of observations (excluding index cases) | Serial interval (95%CI), empirical data | Serial interval (95%CI), estimated from the fit of a gamma distribution | Parameters of the gamma distribution (shape, rate) |
|---------------------------------------------------------------|--------------------|------------------------------------------------|-----------------------------------------|-------------------------------------------------------------------------|----------------------------------------------------|
| Non censored*                                                 | 28                 | 35                                             | 5.0 days (0.9-10.1)                     | 5.0 days (0.8-13.0)                                                     | 2.39, 0.48                                         |
| >0 days#                                                      | 27                 | 34                                             | 5.1 days (1.0-10.2)                     | 5.1 days (1.3-11.6)                                                     | 3.63, 0.71                                         |
| >1 day                                                        | 25                 | 32                                             | 5.4 days (2.0-10.2)                     | 5.4 days (1.8-10.9)                                                     | 5.18, 0.96                                         |
| >2 days                                                       | 23                 | 29                                             | 5.8 days (3.0-10.3)                     | 5.8 days (2.4-10.7)                                                     | 7.28, 1.26                                         |
| >3 days                                                       | 19                 | 24                                             | 6.3 days (4.0-10.4)                     | 6.3 days (3.2-10.5)                                                     | 11.49, 1.81                                        |

\* Considering all observations.

# Result presented in the main text.

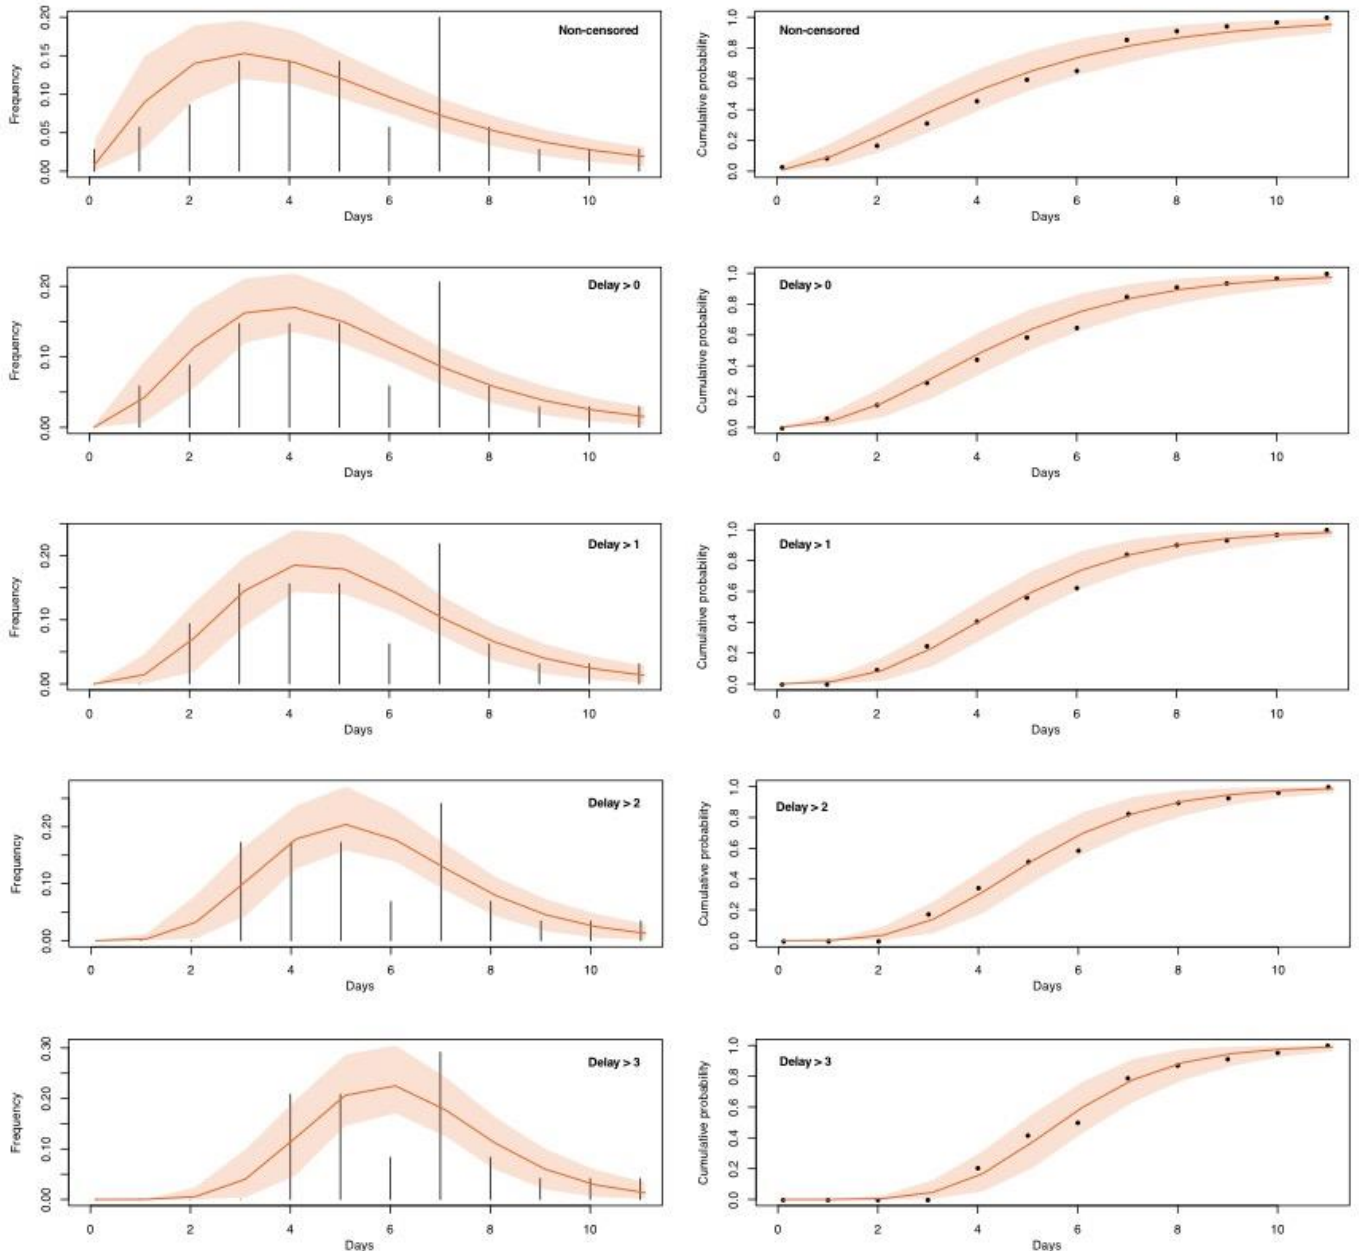

**Figure. S5. Serial interval distribution (data, vertical lines) and fitted gamma distributions (mean, line; 95%CI, shaded area) by considering difference censoring of the data.**

## Reproduction number

The basic reproduction number  $R_0$  represents the average number of secondary cases generated by a primary infector in a fully susceptible population. In general terms, when  $R_0$  is larger than 1 the infection may spread in the population and the larger  $R_0$  the larger effort required to control the epidemic. Once the number of susceptible individuals decline, the transmission potential of the disease at a given time  $t$  is measured in terms of the net reproduction number  $R_t$ . The net reproduction number is useful to track the effectiveness of performed control measures and other factors affecting the spread of the epidemic (e.g., the behavioral response of the population) over time. As soon as  $R_t$  falls below 1, the epidemic starts to decline.

To estimate  $R_t$ , we adjusted the methodology presented in references<sup>7,8</sup> to account for the importation of cases. We assume that the daily number of new cases (date of symptom onset) with locally acquired infection  $L(t)$  can be approximated by a Poisson distribution according to the equation

$$L(t) \sim \text{Pois} \left( R(t) \sum_{s=1}^T \varphi(s) C(t-s) \right)$$

where

- $C(t)$ , with  $t$  from 0 to  $T$ , is daily number of new cases (date of symptom onset);
- $R(t)$  is the net reproduction number at time  $t$ ;
- $\varphi(s)$  is the distribution of the generation time (corresponding to the distribution of the serial interval) calculated at time  $s$ .

The likelihood  $\mathcal{L}$  of the observed time series of cases from day 1 to  $T$  conditional on  $C(0)$  is thus given by

$$\mathcal{L} = \prod_{t=1}^T P \left( L(t); R(t) \sum_{s=1}^T \varphi(s) C(t-s) \right)$$

where  $P(k; \lambda)$  is the probability mass function of a Poisson distribution (i.e., the probability of observing  $k$  events if these events occur with rate  $\lambda$ ).

We then use Metropolis-Hastings MCMC sampling to estimate the posterior distribution of  $R(t)$ .

It should be noted that, when estimating  $R(t)$  we exclude data the last 9 days of the dataset to deal with the possible incompleteness of the dataset in the most recent dates due to reporting delays. The choice of 9 days is motivated by the fact that in the period from January 28 to February 17, we estimate the 90<sup>th</sup> percentile of the distribution of the time from onset to announcement in mainland China outside Hubei Province to be 9.0 days. We tested the robustness of this method by artificially right censoring all the data reported after January 28 and comparing the resulting estimates of  $R(t)$  with those obtained by using the dataset up to February 17.

It is important to mention that the developed method to estimate  $R(t)$  does not take into consideration the possibility that an imported case may have already started to transmit the infection during her/his travel. Although difficult to test, we feel that this is a limitation will have a negligible impact on the obtained estimates.

In the main text, we provided estimates of  $R(t)$  for three locations where we have validated our individual records against the full official line list compiled by the respective local health authorities. Here, we selected seven additional locations among the most affected provinces of mainland China (excluding Hubei Province) for which we have a representative sample (see Tab. S4 and Fig. S1). For these seven locations, the temporal series of confirmed COVID-19 cases and the estimated net reproduction number are shown in Fig. S6 and S7. The epidemic follows highly different patterns in the different provinces ranging from situations mostly characterized by the importation of cases and limited local transmission (e.g., Henan Province) to situations characterized by prolonged sustained local transmission reaching values as high as 3 (e.g., Jiangxi Province).

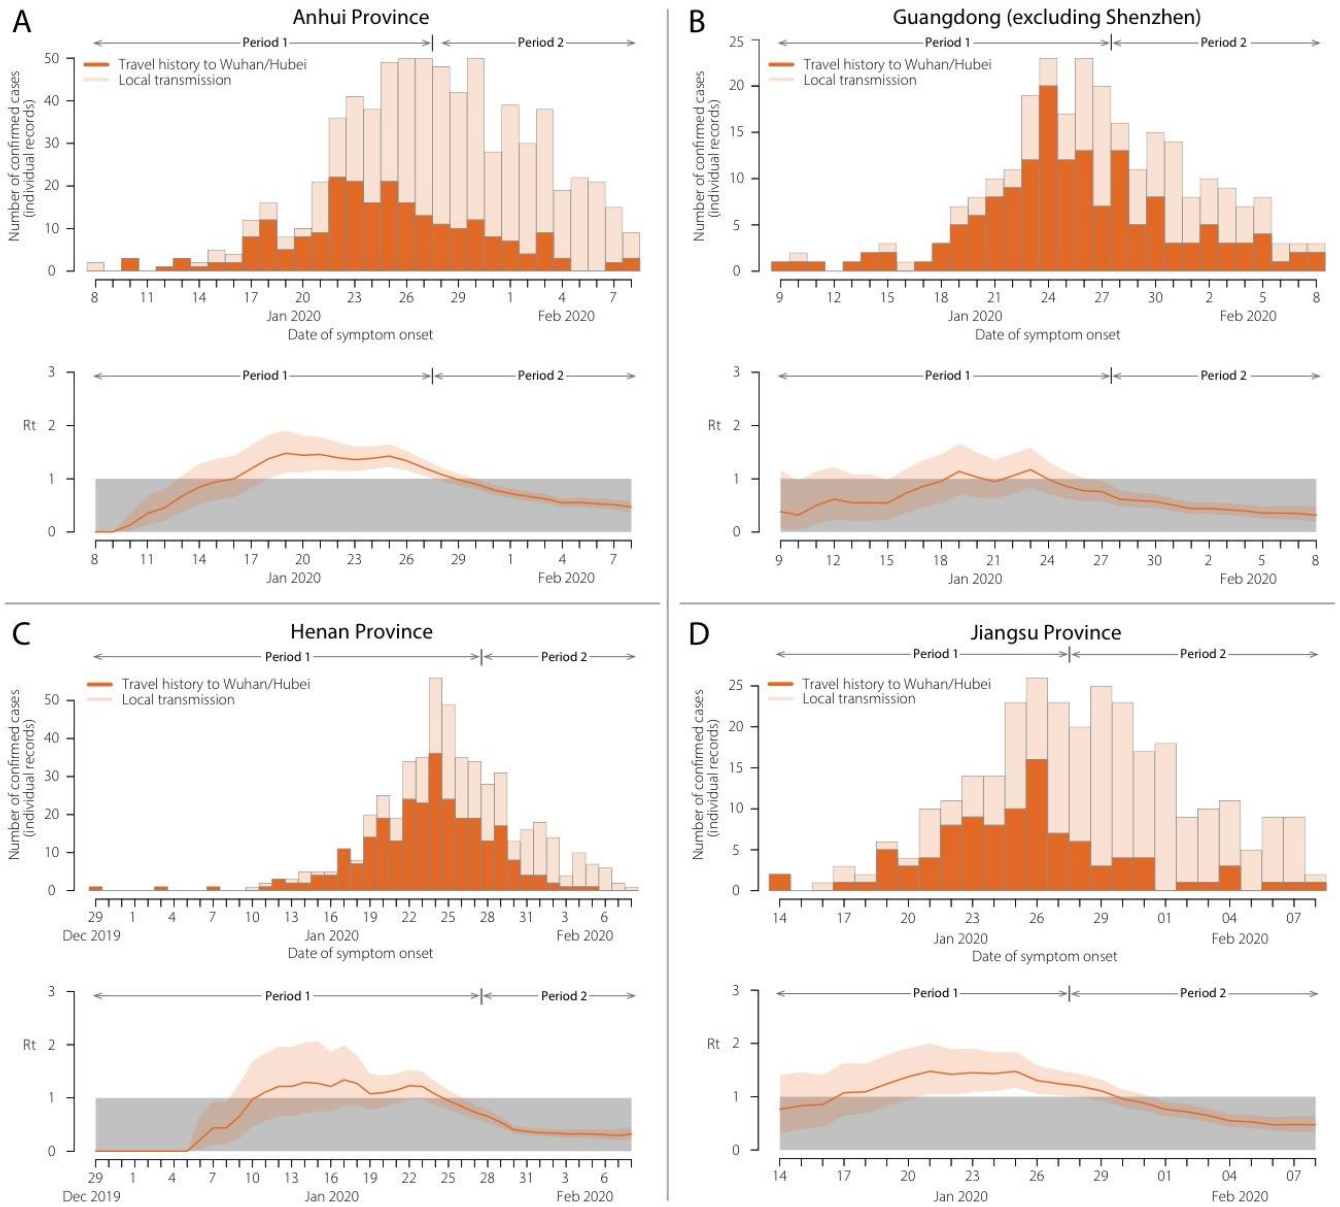

**Figure. S6. A Top: Daily number of new cases (date of symptom onset) in Anhui Province divided into cases with travel history to Wuhan/Hubei and local transmission. Bottom: Estimated net reproduction number ( $R_t$ ) over 4-day moving average by considering the estimated serial interval of mean 5.8 days (95%CI: 2.4-10.7). We excluded data after February 8, 2020 to account for the reporting delay – we estimated that during period 2 of the epidemic, the 90<sup>th</sup> percentile of the distribution of the time from onset to announcement in mainland China outside Hubei Province is 9.0 days. B Same as A, but for Guangdong Province (excluding Shenzhen). C Same as A, but for Henan Province. D Same as A, but for Jiangsu Province.**

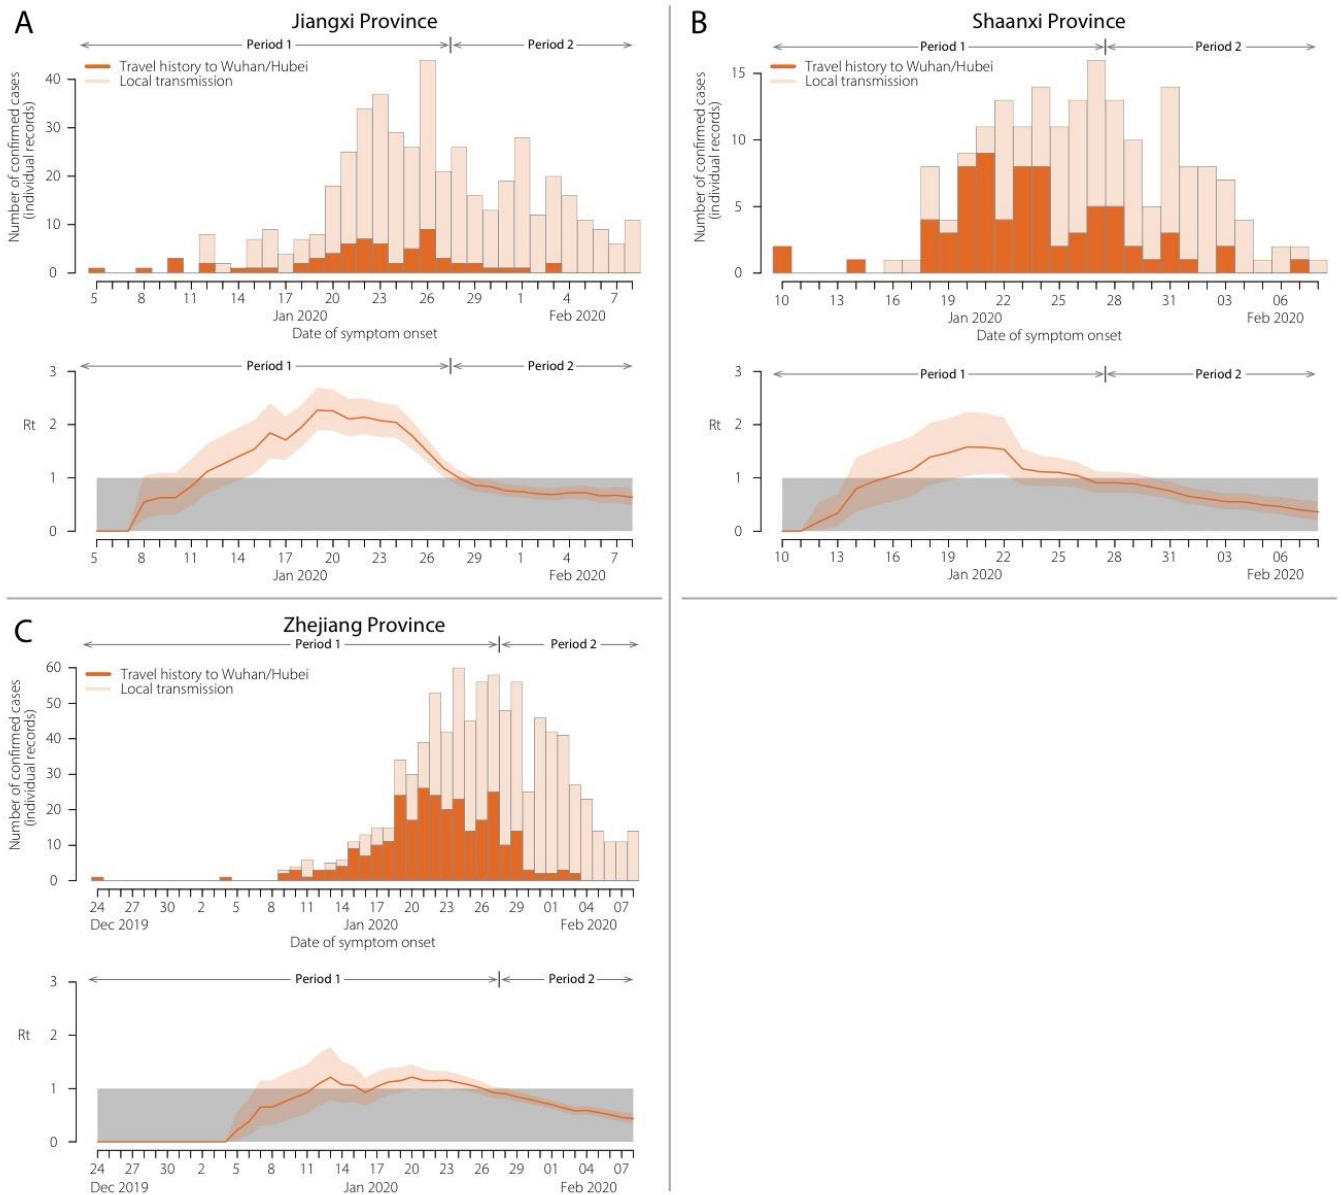

**Figure. S7. A Top: Daily number of new cases (date of symptom onset) in Jiangxi Province divided into cases with travel history to Wuhan/Hubei and local transmission. Bottom: Estimated net reproduction number ( $R_t$ ) over 4-day moving average by considering the estimated serial interval of mean 5.8 days (95%CI: 2.4-10.7). We excluded data after February 8, 2020 to account for the reporting delay – we estimated that during period 2 of the epidemic, the 90<sup>th</sup> percentile of the distribution of the time from onset to announcement in mainland China outside Hubei Province is 9.0 days. B Same as A, but for Shaanxi. C Same as A, but for Zhejiang Province.**

## References

1. Chinese Center for Disease Control and Prevention. Epidemic update and risk assessment of 2019 Novel Coronavirus. 2020. <http://www.chinacdc.cn/yvrdgz/202001/P020200128523354919292.pdf> (accessed Feb 18 2020).
2. National Health Commission of the People's Republic of China. Diagnosis and treatment guideline on pneumonia infection with 2019 novel coronavirus (the fifth trial edition). 2020. <http://www.nhc.gov.cn/xcs/zhengcwj/202002/d4b895337e19445f8d728fcf1e3e13a.shtml> (accessed Feb 18 2020).
3. Li Q, Guan X, Wu P, et al. Early Transmission Dynamics in Wuhan, China, of Novel Coronavirus-Infected Pneumonia. *N Engl J Med* 2020.
4. The 2019-nCoV Outbreak Joint Field Epidemiology Investigation Team. An Outbreak of NCIP (2019-nCoV) Infection in China— Wuhan, Hubei Province, 2019–2020. *China CDC Weekly* 2020; **2**(5): 79-80.
5. National Health Commission of the People's Republic of China. Inclusion of 2019 novel coronavirus diseases (COVID-19) into statutory infectious disease management. 2020. <http://www.nhc.gov.cn/jkj/s7916/202001/44a3b8245e8049d2837a4f27529cd386.shtml> (accessed Feb 18 2020).
6. Virlogeux V, Li M, Tsang TK, et al. Estimating the Distribution of the Incubation Periods of Human Avian Influenza A(H7N9) Virus Infections. *Am J Epidemiol* 2015; **182**(8): 723-9.
7. Liu Q-H, Ajelli M, Aleta A, Merler S, Moreno Y, Vespignani A. Measurability of the epidemic reproduction number

in data-driven contact networks. *Proc Natl Acad Sci* 2018; **115**(50): 12680.

8. World Health Organization Ebola Response Team, Aylward B, Barboza P, et al. Ebola virus disease in West Africa--the first 9 months of the epidemic and forward projections. *N Engl J Med* 2014; **371**(16): 1481-95.
